# Supplementary material for: Integrated pyroptosis measurement and metabolomics to elucidate the effect and mechanism of tangzhiqing on atherosclerosis
Source: Front Physiol. 2022 Sep 12;13:937737. doi: 10.3389/fphys.2022.937737 (PMC9512057; doi:10.3389/fphys.2022.937737)
Supplement: Supplementary file 2 [file Table3.xlsx]

## Sheet: Compound-Reaction-Enzyme-Gene d
canonicalName	Category	Compound.approximateMW	Compound.casnum	Compound.cid	Compound.formula	Compound.mw	Compound.name	Compound.pubchemcid	Compound.smiles	Compound.synonyms	Enzyme.ecnum	Enzyme.name	Gene.description	Gene.human.geneid	Gene.locations	Gene.symbol	name	Reaction.equation	Reaction.isReversible	Reaction.locations	Reaction.pathway	Reaction.rid	selected	shared name	Type
11-beta-hydroxysteroid dehydrogenase	Enzyme										1.1.1.146	11-beta-hydroxysteroid dehydrogenase					1.1.1.146						TRUE	1.1.1.146	Enzyme
3-alpha-hydroxysteroid dehydrogenase (B-specific)	Enzyme										1.1.1.50	3-alpha-hydroxysteroid dehydrogenase (B-specific)					1.1.1.50						TRUE	1.1.1.50	Enzyme
Arachidonate 12-lipoxygenase	Enzyme										1.13.11.31	Arachidonate 12-lipoxygenase					1.13.11.31						FALSE	1.13.11.31	Enzyme
Arachidonate 15-lipoxygenase	Enzyme										1.13.11.33	Arachidonate 15-lipoxygenase					1.13.11.33						FALSE	1.13.11.33	Enzyme
Arachidonate 5-lipoxygenase	Enzyme										1.13.11.34	Arachidonate 5-lipoxygenase					1.13.11.34						FALSE	1.13.11.34	Enzyme
Unspecific monooxygenase	Enzyme										1.14.14.1	Unspecific monooxygenase					1.14.14.1						FALSE	1.14.14.1	Enzyme
Alkane 1-monooxygenase	Enzyme										1.14.15.3	Alkane 1-monooxygenase					1.14.15.3						FALSE	1.14.15.3	Enzyme
Prostaglandin-endoperoxide synthase	Enzyme										1.14.99.1	Prostaglandin-endoperoxide synthase					1.14.99.1						FALSE	1.14.99.1	Enzyme
SLC27A2	Gene												"solute carrier family 27 (fatty acid transporter), member 2"	11001	mitochondrion|peroxisome|peroxisomal membrane|peroxisomal matrix|endoplasmic reticulum|membrane|integral to membrane	SLC27A2	11001						FALSE	11001	Gene
AKR1C4	Gene												"aldo-keto reductase family 1, member C4 (chlordecone reductase; 3-alpha hydroxysteroid dehydrogenase, type I; dihydrodiol dehydrogenase 4)"	1109	cytoplasm|cytosol	AKR1C4	1109						TRUE	1109	Gene
CYP4F8	Gene												"cytochrome P450, family 4, subfamily F, polypeptide 8"	11283	endoplasmic reticulum|microsome|membrane|integral to membrane	CYP4F8	11283						FALSE	11283	Gene
PLA2G4E	Gene												"phospholipase A2, group IVE"	123745	cytoplasm|lysosome|cytosol|membrane	PLA2G4E	123745						FALSE	123745	Gene
CYP1A1	Gene												"cytochrome P450, family 1, subfamily A, polypeptide 1"	1543	cytoplasm|mitochondrion|endoplasmic reticulum|microsome|membrane|extrinsic to membrane	CYP1A1	1543						FALSE	1543	Gene
CYP1A2	Gene												"cytochrome P450, family 1, subfamily A, polypeptide 2"	1544	endoplasmic reticulum|endoplasmic reticulum membrane|microsome|membrane|extrinsic to membrane	CYP1A2	1544						FALSE	1544	Gene
CYP1B1	Gene												"cytochrome P450, family 1, subfamily B, polypeptide 1"	1545	endoplasmic reticulum|endoplasmic reticulum membrane|microsome|membrane|extrinsic to membrane	CYP1B1	1545						FALSE	1545	Gene
CYP2A6	Gene												"cytochrome P450, family 2, subfamily A, polypeptide 6"	1548	endoplasmic reticulum|endoplasmic reticulum membrane|microsome|membrane|extrinsic to membrane	CYP2A6	1548						FALSE	1548	Gene
CYP2A7	Gene												"cytochrome P450, family 2, subfamily A, polypeptide 7"	1549	endoplasmic reticulum|microsome|membrane|extrinsic to membrane	CYP2A7	1549						FALSE	1549	Gene
CYP3A7	Gene												"cytochrome P450, family 3, subfamily A, polypeptide 7"	1551	endoplasmic reticulum|endoplasmic reticulum membrane|microsome|membrane|extrinsic to membrane	CYP3A7	1551						FALSE	1551	Gene
CYP2A13	Gene												"cytochrome P450, family 2, subfamily A, polypeptide 13"	1553	endoplasmic reticulum|endoplasmic reticulum membrane|microsome|membrane|extrinsic to membrane	CYP2A13	1553						FALSE	1553	Gene
CYP2B6	Gene												"cytochrome P450, family 2, subfamily B, polypeptide 6"	1555	endoplasmic reticulum|endoplasmic reticulum membrane|microsome|microsome|membrane|extrinsic to membrane	CYP2B6	1555						FALSE	1555	Gene
CYP2C8	Gene												"cytochrome P450, family 2, subfamily C, polypeptide 8"	1558	endoplasmic reticulum|endoplasmic reticulum membrane|microsome|membrane|extrinsic to membrane	CYP2C8	1558						FALSE	1558	Gene
CYP2C9	Gene												"cytochrome P450, family 2, subfamily C, polypeptide 9"	1559	endoplasmic reticulum|endoplasmic reticulum membrane|microsome|microsome|membrane|extrinsic to membrane	CYP2C9	1559						FALSE	1559	Gene
CYP2C18	Gene												"cytochrome P450, family 2, subfamily C, polypeptide 18"	1562	endoplasmic reticulum|endoplasmic reticulum membrane|microsome|membrane|extrinsic to membrane	CYP2C18	1562						FALSE	1562	Gene
CYP2D6	Gene												"cytochrome P450, family 2, subfamily D, polypeptide 6"	1565	endoplasmic reticulum|microsome|membrane|extrinsic to membrane	CYP2D6	1565						FALSE	1565	Gene
CYP2E1	Gene												"cytochrome P450, family 2, subfamily E, polypeptide 1"	1571	Golgi membrane|mitochondrion|endoplasmic reticulum|microsome|membrane|extrinsic to membrane|intrinsic to endoplasmic reticulum membrane	CYP2E1	1571						FALSE	1571	Gene
CYP2F1	Gene												"cytochrome P450, family 2, subfamily F, polypeptide 1"	1572	endoplasmic reticulum|endoplasmic reticulum membrane|microsome|membrane|extrinsic to membrane	CYP2F1	1572						FALSE	1572	Gene
CYP2J2	Gene												"cytochrome P450, family 2, subfamily J, polypeptide 2"	1573	endoplasmic reticulum|microsome|membrane|extrinsic to membrane	CYP2J2	1573						FALSE	1573	Gene
CYP3A4	Gene												"cytochrome P450, family 3, subfamily A, polypeptide 4"	1576	cytoplasm|endoplasmic reticulum|endoplasmic reticulum membrane|microsome|cell surface|membrane|integral to membrane	CYP3A4	1576						FALSE	1576	Gene
CYP3A5	Gene												"cytochrome P450, family 3, subfamily A, polypeptide 5"	1577	endoplasmic reticulum|endoplasmic reticulum membrane|microsome|membrane|extrinsic to membrane	CYP3A5	1577						FALSE	1577	Gene
CYP4A11	Gene												"cytochrome P450, family 4, subfamily A, polypeptide 11"	1579	endoplasmic reticulum|endoplasmic reticulum membrane|microsome|membrane|extrinsic to membrane	CYP4A11	1579						FALSE	1579	Gene
CYP4B1	Gene												"cytochrome P450, family 4, subfamily B, polypeptide 1"	1580	endoplasmic reticulum|endoplasmic reticulum membrane|microsome|membrane|extrinsic to membrane	CYP4B1	1580						FALSE	1580	Gene
CYP19A1	Gene												"cytochrome P450, family 19, subfamily A, polypeptide 1"	1588	membrane fraction|endoplasmic reticulum|membrane|extrinsic to membrane	CYP19A1	1588						FALSE	1588	Gene
CYP4Z1	Gene												"cytochrome P450, family 4, subfamily Z, polypeptide 1"	199974	endoplasmic reticulum|microsome|membrane|integral to membrane	CYP4Z1	199974						FALSE	199974	Gene
ACSL1	Gene												acyl-CoA synthetase long-chain family member 1	2180	soluble fraction|mitochondrion|mitochondrial outer membrane|peroxisome|peroxisomal membrane|endoplasmic reticulum|microsome|cytosol|plasma membrane|integral to membrane	ACSL1	2180						FALSE	2180	Gene
ACSL3	Gene												acyl-CoA synthetase long-chain family member 3	2181	mitochondrion|mitochondrial outer membrane|peroxisome|endoplasmic reticulum|microsome|membrane|integral to membrane	ACSL3	2181						FALSE	2181	Gene
ACSL4	Gene												acyl-CoA synthetase long-chain family member 4	2182	mitochondrion|mitochondrial outer membrane|peroxisome|endoplasmic reticulum|microsome|plasma membrane|integral to membrane	ACSL4	2182						FALSE	2182	Gene
ACSL6	Gene												acyl-CoA synthetase long-chain family member 6	23305	mitochondrion|mitochondrial outer membrane|peroxisome|peroxisomal membrane|endoplasmic reticulum|microsome|plasma membrane|integral to membrane	ACSL6	23305						FALSE	23305	Gene
ALOX12	Gene												arachidonate 12-lipoxygenase	239	cytoplasm|cytosol|sarcolemma	ALOX12	239						FALSE	239	Gene
ALOX5	Gene												arachidonate 5-lipoxygenase	240	soluble fraction|nucleus|nuclear envelope lumen|cytoplasm|cytosol|membrane|nuclear matrix|extrinsic to membrane|dendrite|nuclear membrane|sarcolemma	ALOX5	240						FALSE	240	Gene
ALOX15	Gene												arachidonate 15-lipoxygenase	246	cytoplasm|cytosol	ALOX15	246						FALSE	246	Gene
ALOX15B	Gene												"arachidonate 15-lipoxygenase, type B"	247	intracellular|cytoplasm	ALOX15B	247						FALSE	247	Gene
PLA2G4F	Gene												"phospholipase A2, group IVF"	255189	cytoplasm|lysosome|cytosol|membrane	PLA2G4F	255189						FALSE	255189	Gene
CYP4X1	Gene												"cytochrome P450, family 4, subfamily X, polypeptide 1"	260293	endoplasmic reticulum|microsome|membrane|extrinsic to membrane	CYP4X1	260293						FALSE	260293	Gene
PLA2G2D	Gene												"phospholipase A2, group IID"	26279	extracellular region	PLA2G2D	26279						FALSE	26279	Gene
PLA2G4D	Gene												"phospholipase A2, group IVD (cytosolic)"	283748	cytoplasm|cytosol|membrane|cytoplasmic vesicle	PLA2G4D	283748						FALSE	283748	Gene
CYP4A22	Gene												"cytochrome P450, family 4, subfamily A, polypeptide 22"	284541	endoplasmic reticulum|microsome|membrane|extrinsic to membrane	CYP4A22	284541						FALSE	284541	Gene
CYP2S1	Gene												"cytochrome P450, family 2, subfamily S, polypeptide 1"	29785	endoplasmic reticulum|endoplasmic reticulum membrane|microsome|membrane|extrinsic to membrane	CYP2S1	29785						FALSE	29785	Gene
Acting on ester bonds	Enzyme										3.1.-.-	Acting on ester bonds					3.1.-.-						FALSE	3.1.-.-	Enzyme
Phospholipase A(2)	Enzyme										3.1.1.4	Phospholipase A(2)					3.1.1.4						FALSE	3.1.1.4	Enzyme
PLA2G2E	Gene												"phospholipase A2, group IIE"	30814	extracellular region	PLA2G2E	30814						FALSE	30814	Gene
HSD11B1	Gene												hydroxysteroid (11-beta) dehydrogenase 1	3290	endoplasmic reticulum|endoplasmic reticulum membrane|membrane|integral to membrane	HSD11B1	3290						TRUE	3290	Gene
HSD11B2	Gene												hydroxysteroid (11-beta) dehydrogenase 2	3291	cytoplasm|endoplasmic reticulum|microsome	HSD11B2	3291						TRUE	3291	Gene
PLA2G3	Gene												"phospholipase A2, group III"	50487	extracellular region|extracellular space|plasma membrane	PLA2G3	50487						FALSE	50487	Gene
ACSL5	Gene												acyl-CoA synthetase long-chain family member 5	51703	mitochondrion|mitochondrial outer membrane|mitochondrial inner membrane|endoplasmic reticulum|membrane|integral to membrane	ACSL5	51703						FALSE	51703	Gene
PFKFB1	Gene												"6-phosphofructo-2-kinase/fructose-2,6-biphosphatase 1"	5207	cytosol|"6-phosphofructo-2-kinase/fructose-2,6-biphosphatase 1 complex"	PFKFB1	5207						FALSE	5207	Gene
PFKFB2	Gene												"6-phosphofructo-2-kinase/fructose-2,6-biphosphatase 2"	5208	cytoplasm|cytosol	PFKFB2	5208						FALSE	5208	Gene
PLA2G1B	Gene												"phospholipase A2, group IB (pancreas)"	5319	extracellular region|extracellular space|secretory granule	PLA2G1B	5319						FALSE	5319	Gene
PLA2G2A	Gene												"phospholipase A2, group IIA (platelets, synovial fluid)"	5320	extracellular region|extracellular space|mitochondrion|endoplasmic reticulum|membrane|extrinsic to membrane|secretory granule	PLA2G2A	5320						FALSE	5320	Gene
PLA2G4A	Gene												"phospholipase A2, group IVA (cytosolic, calcium-dependent)"	5321	membrane fraction|nucleus|cytoplasm|endoplasmic reticulum membrane|cytosol|cytosol|integral to membrane|cytoplasmic membrane-bounded vesicle|zymogen granule|perinuclear region of cytoplasm	PLA2G4A	5321						FALSE	5321	Gene
PLA2G5	Gene												"phospholipase A2, group V"	5322	extracellular region|Golgi apparatus|plasma membrane|cell surface|perinuclear region of cytoplasm	PLA2G5	5322						FALSE	5322	Gene
PTGS1	Gene												prostaglandin-endoperoxide synthase 1 (prostaglandin G/H synthase and cyclooxygenase)	5742	nucleus|nuclear envelope|cytoplasm|cytoplasm|endoplasmic reticulum|microsome|Golgi apparatus|plasma membrane|extrinsic to membrane	PTGS1	5742						FALSE	5742	Gene
PTGS2	Gene												prostaglandin-endoperoxide synthase 2 (prostaglandin G/H synthase and cyclooxygenase)	5743	nucleus|cytoplasm|cytoplasm|endoplasmic reticulum|endoplasmic reticulum lumen|microsome|caveola|membrane|extrinsic to membrane|protein complex	PTGS2	5743						FALSE	5743	Gene
CYP4F11	Gene												"cytochrome P450, family 4, subfamily F, polypeptide 11"	57834	cellular_component|endoplasmic reticulum|endoplasmic reticulum membrane|microsome|membrane|integral to membrane	CYP4F11	57834						FALSE	57834	Gene
Long-chain-fatty-acid--CoA ligase	Enzyme										6.2.1.3	Long-chain-fatty-acid--CoA ligase					6.2.1.3						FALSE	6.2.1.3	Enzyme
PLA2G2F	Gene												"phospholipase A2, group IIF"	64600	extracellular region	PLA2G2F	64600						FALSE	64600	Gene
CYP3A43	Gene												"cytochrome P450, family 3, subfamily A, polypeptide 43"	64816	endoplasmic reticulum|microsome|membrane|extrinsic to membrane	CYP3A43	64816						FALSE	64816	Gene
CYP4F12	Gene												"cytochrome P450, family 4, subfamily F, polypeptide 12"	66002	endoplasmic reticulum|endoplasmic reticulum membrane|microsome|membrane|integral to membrane	CYP4F12	66002						FALSE	66002	Gene
PLA2G12A	Gene												"phospholipase A2, group XIIA"	81579	extracellular region|intracellular|cytoplasm|endoplasmic reticulum|Golgi apparatus	PLA2G12A	81579						FALSE	81579	Gene
PLA2G6	Gene												"phospholipase A2, group VI (cytosolic, calcium-independent)"	8398	nucleus|cytoplasm|centrosome|membrane|extrinsic to membrane	PLA2G6	8398						FALSE	8398	Gene
PLA2G10	Gene												"phospholipase A2, group X"	8399	extracellular region	PLA2G10	8399						FALSE	8399	Gene
PLA2G12B	Gene												"phospholipase A2, group XIIB"	84647	extracellular region|endoplasmic reticulum	PLA2G12B	84647						FALSE	84647	Gene
PLA2G4C	Gene												"phospholipase A2, group IVC (cytosolic, calcium-independent)"	8605	cytosol|membrane|anchored to membrane	PLA2G4C	8605						FALSE	8605	Gene
LOC100137047-PLA2G4B	Gene												JMJD7-PLA2G4B readthrough	8681	NONE	LOC100137047-PLA2G4B	8681						FALSE	8681	Gene
Phosphatidylcholine	Compound	2049	8002-43-5	C00157	C10H18NO8PR2	0	Phosphatidylcholine	452110	CCCCCC(C(CC(C(CCCCCCCC(=O)OCC(COP(=O)([O-])OCC[N+](C)(C)C)OC(=O)CCCCCCCCC(C(CC(C(CC(C(C)I)I)I)I)I)I)I)I)I)I	Phosphatidylcholine|"1,2-Diacyl-sn-glycero-3-phosphocholine"|Lecithin|Choline phosphatide|Phosphatidyl-N-trimethylethanolamine|3-sn-Phosphatidylcholine							C00157						FALSE	C00157	Compound
Ethanolamine	Compound	61	141-43-5	C00189	C2H7NO	61.0831	Ethanolamine	700	C(CO)N	Ethanolamine|2-Hydroxyethylamine|Aminoethanol|2-aminoethanol							C00189						FALSE	C00189	Compound
Arachidonate	Input Compound	304	506-32-1	C00219	C20H32O2	304.467	Arachidonate	231	CCCCCC=CCC=CCC=CCC=CCCCC(=O)O	Arachidonate|"cis-5,8,11,14-Eicosatetraenoic acid"|"(5Z,8Z,11Z,14Z)-Icosatetraenoic acid"|Arachidonic acid|"(5Z,8Z,11Z,14Z)-icosa-5,8,11,14-tetraenoic acid"							C00219						FALSE	C00219	Compound
Arachidonyl-CoA	Compound	1053	17046-56-9	C02249	C41H66N7O17P3S	1053.99	Arachidonyl-CoA	5280503	CCCCC\C=C/C\C=C/C\C=C/C\C=C/CCCC(=O)SCCNC(=O)CCNC(=O)C(O)C(C)(C)COP(O)(=O)OP(O)(=O)OC[C@H]1O[C@H]([C@H](O)[C@@H]1OP(O)(O)=O)n2cnc3c(N)ncnc23	Arachidonyl-CoA|"(5Z,8Z,11Z,14Z)-Icosatetraenoyl-CoA"|Arachidonoyl-CoA|"S-[2-[3-[[4-[[[(2R,3S,4R,5R)-5-(6-aminopurin-9-yl)-4-hydroxy-3-phosphonooxyoxolan-2-yl]methoxy-hydroxyphosphoryl]oxy-hydroxyphosphoryl]oxy-2-hydroxy-3,3-dimethylbutanoyl]amino]propanoylamino]ethyl] (5Z,8Z,11Z,14Z)-icosa-5,8,11,14-tetraenethioate"							C02249						FALSE	C02249	Compound
5(S)-HPETE	Compound	336	NULL	C05356	C20H32O4	336.466	5(S)-HPETE	5280778	C(O)(=O)CCCC(OO)C=CC=CCC=CCC=CCCCCC	5(S)-HPETE|"5(S)-Hydroperoxy-6-trans-8,11,14-cis-eicosatetraenoic acid"|"(6E,8Z,11Z,14Z)-(5S)-5-Hydroperoxyeicosa-6,8,11,14-tetraenoic acid"|"(6E,8Z,11Z,14Z)-(5S)-5-Hydroperoxyeicosa-6,8,11,14-tetraenoate"|"(5S,6E,8Z,11Z,14Z)-5-Hydroperoxyicosa-6,8,11,14-tetraenoate"|"(5S,6E,8Z,11Z,14Z)-5-hydroperoxyicosa-6,8,11,14-tetraenoic acid"							C05356						FALSE	C05356	Compound
"11beta,21-Dihydroxy-5beta-pregnane-3,20-dione"	Compound	348	566-01-8	C05475	C21H32O4	348.476	"11beta,21-Dihydroxy-5beta-pregnane-3,20-dione"	440696	CC12CCC(=O)CC1CCC3C4CCC(C(=O)CO)C4(C)CC(O)C23	"11beta,21-Dihydroxy-5beta-pregnane-3,20-dione"|"5beta-Pregnane-11beta,21-diol-3,20-dione"|"11-hydroxy-17-(2-hydroxyacetyl)-10,13-dimethyl-1,2,4,5,6,7,8,9,11,12,14,15,16,17-tetradecahydrocyclopenta[a]phenanthren-3-one"							C05475						TRUE	C05475	Compound
Tetrahydrocorticosterone	Input Compound	350	68-42-8	C05476	C21H34O4	350.492	Tetrahydrocorticosterone	65553	C[C@]12CC[C@H](C[C@H]1CC[C@@H]3[C@@H]2[C@H](C[C@]4([C@H]3CC[C@@H]4C(=O)CO)C)O)O	Tetrahydrocorticosterone|"1-[(3R,5R,8S,9S,10S,11S,13S,14S,17S)-3,11-dihydroxy-10,13-dimethyl-2,3,4,5,6,7,8,9,11,12,14,15,16,17-tetradecahydro-1H-cyclopenta[a]phenanthren-17-yl]-2-hydroxyethanone"							C05476						TRUE	C05476	Compound
"3alpha,21-Dihydroxy-5beta-pregnane-11,20-dione"	Compound	348	566-03-0	C05478	C21H32O4	348.476	"3alpha,21-Dihydroxy-5beta-pregnane-11,20-dione"	440698	CC12CC[C@@H](O)CC1CCC3C4CCC(C(=O)CO)C4(C)CC(=O)C23	"3alpha,21-Dihydroxy-5beta-pregnane-11,20-dione"|"5beta-Pregnane-3alpha,21-diol-11,20-dione"|"(3R)-3-hydroxy-17-(2-hydroxyacetyl)-10,13-dimethyl-1,2,3,4,5,6,7,8,9,12,14,15,16,17-tetradecahydrocyclopenta[a]phenanthren-11-one"							C05478						TRUE	C05478	Compound
Prostaglandin G2	Compound	368	NULL	C05956	C20H32O6	368.464	Prostaglandin G2	5280883	CCCCC[C@@H](\C=C\[C@H]1[C@H]2C[C@@H]([C@@H]1C/C=C\CCCC(=O)O)OO2)OO	Prostaglandin G2|PGG2|"(Z)-7-[(1S,4R,5R,6R)-5-[(E,3S)-3-hydroperoxyoct-1-enyl]-2,3-dioxabicyclo[2.2.1]heptan-6-yl]hept-5-enoic acid"							C05956						FALSE	C05956	Compound
12(S)-HPETE	Compound	336	NULL	C05965	C20H32O4	336.466	12(S)-HPETE	656507	CCCCCC=CC[C@@H](C=CC=CCC=CCCCC(=O)O)OO	12(S)-HPETE|12-Hydroperoxyicosatetraenoate|"(5Z,8Z,10E,14Z)-(12S)-12-Hydroperoxyicosa-5,8,10,14-tetraenoic acid"|12-Hydroperoxyeicosatetraenoate|12-Hydroperoxyeicosatetraenoic acid|"(5Z,8Z,10E,14Z)-(12S)-12-Hydroperoxyicosa-5,8,10,14-tetraenoate"|12-Hydroperoxyicosatetraenoic acid|"(5Z,8Z,10E,12S,14Z)-12-hydroperoxyicosa-5,8,10,14-tetraenoic acid"							C05965						FALSE	C05965	Compound
15(S)-HPETE	Compound	336	NULL	C05966	C20H32O4	336.466	15(S)-HPETE	5280893	CCCCC[C@@H](\C=C\C=C/C\C=C/C\C=C/CCCC(=O)O)OO	15(S)-HPETE|15-Hydroperoxyicosatetraenoate|15-Hydroperoxyeicosatetraenoate|"(5Z,8Z,11Z,13E)-(15S)-15-Hydroperoxyicosa-5,8,11,13-tetraenoic acid"|15-Hydroperoxyeicosatetraenoic acid|15-Hydroperoxyicosatetraenoic acid|"(5Z,8Z,11Z,13E)-(15S)-15-Hydroperoxyicosa-5,8,11,13-tetraenoate"|"(5Z,8Z,11Z,13E,15S)-15-hydroperoxyicosa-5,8,11,13-tetraenoic acid"							C05966						FALSE	C05966	Compound
Anandamide	Compound	347	94421-68-8	C11695	C22H37NO2	347.535	Anandamide	5281969	CCCCCC=C/CC=C/CC=C/CC=C/CCCC(=O)NCCO	Anandamide|"N-(5Z,8Z,11Z,14Z-icosatetraenoyl)-ethanolamide"|Arachidonylethanolamide|AEA|"(5Z,8Z,11Z,14Z)-N-(2-hydroxyethyl)icosa-5,8,11,14-tetraenamide"							C11695						FALSE	C11695	Compound
20-HETE	Compound	320	79551-86-3	C14748	C20H32O3	320.466	20-HETE	5283157	CCCCC\C=C/C[C@@H](/C=C\C=C/C/C=C/CCCC(=O)O)O	20-HETE|20-Hydroxy arachidonic acid|"(5Z,8Z,11Z,14Z)-20-Hydroxyicosa-5,8,11,14-tetraenoic acid"|20-Hydroxyicosatetraenoic acid|20-Hydroxyeicosatetraenoic acid							C14748						FALSE	C14748	Compound
19(S)-HETE	Compound	320	79551-85-2	C14749	C20H32O3	320.466	19(S)-HETE	0	C[C@@H](O)CCC\C=C/C\C=C/C\C=C/C\C=C/CCCC(O)=O	19(S)-HETE|(19S)-Hydroxyeicosatetraenoic acid|(19S)-Hydroxy arachidonic acid|(19S)-Hydroxyicosatetraenoic acid|"(5Z,8Z,11Z,14Z,19R)-19-hydroxyicosa-5,8,11,14-tetraenoic acid"							C14749						FALSE	C14749	Compound
"5,6-EET"	Compound	320	NULL	C14768	C20H32O3	320.466	"5,6-EET"	5283202	CCCCC\C=C/C\C=C/C\C=C/CC1OC1CCCC(O)=O	"5,6-EET"|"(8Z,11Z,14Z)-5,6-Epoxyicosa-8,11,14-trienoic acid"|"(8Z,11Z,14Z)-5,6-Epoxyeicosa-8,11,14-trienoic acid"|"4-[3-[(2Z,5Z,8Z)-tetradeca-2,5,8-trienyl]oxiran-2-yl]butanoic acid"							C14768						FALSE	C14768	Compound
"8,9-EET"	Compound	320	NULL	C14769	C20H32O3	320.466	"8,9-EET"	5283203	CCCCC\C=C/C\C=C/CC1OC1C\C=C/CCCC(O)=O	"8,9-EET"|"(5Z,11Z,14Z)-8,9-Epoxyeicosa-5,11,14-trienoic acid"|"(5Z,11Z,14Z)-8,9-Epoxyicosa-5,11,14-trienoic acid"|"(Z)-7-[3-[(2Z,5Z)-undeca-2,5-dienyl]oxiran-2-yl]hept-5-enoic acid"							C14769						FALSE	C14769	Compound
"11,12-EET"	Compound	320	NULL	C14770	C20H32O3	320.466	"11,12-EET"	5353269	CCCCC\C=C\CC1C(O1)C\C=C\C\C=C\CCCC(=O)O	"11,12-EET"|"(5Z,8Z,14Z)-11,12-Epoxyeicosa-5,8,14-trienoic acid"|"(5Z,8Z,14Z)-11,12-Epoxyicosa-5,8,14-trienoic acid"|"(5Z,8Z)-10-[3-[(Z)-oct-2-enyl]oxiran-2-yl]deca-5,8-dienoic acid"							C14770						FALSE	C14770	Compound
"14,15-EET"	Compound	320	NULL	C14771	C20H32O3	320.466	"14,15-EET"	5283205	CCCCCC1OC1C\C=C/C\C=C/C\C=C/CCCC(O)=O	"14,15-EET"|"(5Z,8Z,11Z)-14,15-Epoxyeicosa-5.8.11-trienoic acid"|"(5Z,8Z,11Z)-14,15-Epoxyicosa-5.8.11-trienoic acid"|"(5Z,8Z,11Z)-13-(3-pentyloxiran-2-yl)trideca-5,8,11-trienoic acid"							C14771						FALSE	C14771	Compound
16(R)-HETE	Compound	320	NULL	C14778	C20H32O3	320.466	16(R)-HETE	9548884	CCCC[C@@H](O)\C=C/C\C=C/C\C=C/C\C=C/CCCC(O)=O	16(R)-HETE|"(5Z,8Z,11Z,14Z)-(16R)-16-Hydroxyeicosa-5,8,11,14-tetraenoic acid"|"(5Z,8Z,11Z,14Z)-(16R)-16-Hydroxyicosa-5,8,11,14-tetraenoic acid"|"(5Z,8Z,11Z,14Z,16R)-16-hydroxyicosa-5,8,11,14-tetraenoic acid"							C14778						FALSE	C14778	Compound
9(S)-HETE	Compound	320	107656-13-3	C14779	C20H32O3	320.466	9(S)-HETE		CCCCC\C=C/C\C=C/C[C@H](O)\C=C\C=C/CCCC(O)=O	9(S)-HETE|"(5Z,7E,11Z,14Z)-(9S)-9-Hydroxyicosa-5,7,11,14-tetraenoic acid"|"(5Z,7E,11Z,14Z)-(9S)-9-Hydroxyeicosa-5,7,11,14-tetraenoic acid"|"(5Z,7E,9S,11Z,14Z)-9-hydroxyicosa-5,7,11,14-tetraenoic acid"							C14779						FALSE	C14779	Compound
11-hydroxyeicosatetraenoate	Compound	0	NULL	CE1450	C20H31O3	0	11-hydroxyeicosatetraenoate		CCCCC/C=C\C=C\C(O)C\C=C/C\C=C/CCCC([O-])=O	11-hydroxyeicosatetraenoate|11-HETE|11-hydroxy-arachidonic acid anion|11-hydroxyeicosatetraenoic acid anion							CE1450						FALSE	CE1450	Compound
"15(R)-Hydroxy-(5Z,8Z,11Z,13E)-eicosatetraenoate"	Compound	0	83603-31-0	CE2565	C20H31O3	0	"15(R)-Hydroxy-(5Z,8Z,11Z,13E)-eicosatetraenoate"		CCCCC[C@@H](O)\C=C\C=C/C\C=C/C\C=C/CCCC([O-])=O	"15(R)-Hydroxy-(5Z,8Z,11Z,13E)-eicosatetraenoate"|15(R)-hydroperoxyeicosatetraenoate|15(R)-HETE|"15(R)-hydroxy-(5Z,8Z,11Z,13E)-eicosatetraenoic acid anion"|"(5Z,8Z,11Z,13E)-(15R)-hydroperoxyeicosa-5,8,11,13-tetraenoic acid anion"							CE2565						FALSE	CE2565	Compound
8-hydroxyeicosatetraenoate	Compound	0	NULL	CE5705	C20H31O3	0	8-hydroxyeicosatetraenoate		CCCCC\C=C/C/C=C\C=C\C(O)C\C=C/CCCC([O-])=O	8-hydroxyeicosatetraenoate|"8-hydroxy-(5Z,9E,11Z,14Z)-eicosatetraenoic acid"|8-HETE							CE5705						FALSE	CE5705	Compound
13-HETE	Compound	0	NULL	CE7228	C20H31O3	0	13-HETE		CCCCC\C=C/C(O)\C=C/C\C=C/C\C=C/CCCC([O-])=O	13-HETE|"13-hydroxy-5Z,8Z,11Z,14Z-eicosatetraenoate"							CE7228						FALSE	CE7228	Compound
7-HETE	Compound	0	NULL	CE7231	C20H31O3	0	7-HETE		"*.[#6]CCCC\C=C/C\C=C/C\C=C/C([#8])\C=C/CCCC([#8-])=O |w:14,13,$ _p;;;;;;;;;;;;;;;;;;;;;;;$|"	7-HETE|"7-hydroxyeicosa-5Z,8Z,11Z,14Z-tetraenoate"							CE7231						FALSE	CE7231	Compound
10-HETE	Compound	0	NULL	CE7234	C20H31O3	0	10-HETE		CCCCC\C=C/C\C=C/C(O)\C=C/C\C=C/CCCC([O-])=O	10-HETE|"10-hydroxyeicosa-all-cis-5,8,11,14-tetraenoate"							CE7234						FALSE	CE7234	Compound
18-HETE	Compound	0	NULL	CE7243	C20H31O3	0	18-HETE		CCC(O)CC\C=C/C\C=C/C\C=C/C\C=C/CCCC([O-])=O	18-HETE|"18-hydroxyeicosa -all-cis-5,8,11,14-tetraenoate"|18-hydroxyeicosatetraenate							CE7243						FALSE	CE7243	Compound
17-HETE	Compound	0	NULL	CE7244	C20H31O3	0	17-HETE		CCCC(O)C\C=C/C\C=C/C\C=C/C\C=C/CCCC([O-])=O	17-HETE|17-hydroxyeicosatetraenate|"17-hydroxyeicosa-all-cis-5,8,11,14-tetraenoate"							CE7244						FALSE	CE7244	Compound
R01317	Reaction																R01317	"Phosphatidylcholine+H2O=Lysophospholipid +(5Z,8Z,11Z,14Z)-Icosatetraenoic acid"	no	endoplasmic reticulum|cytosol|extracellular|mitochondria	Arachidonic acid metabolism	R01317	FALSE	R01317	Reaction
R01590	Reaction																R01590	"(5Z,8Z,11Z,14Z)-Icosatetraenoic acid+2 Oxygen=Prostaglandin G2"	no	endoplasmic reticulum|cytosol	Prostaglandin formation from arachidonate	R01590	FALSE	R01590	Reaction
R01593	Reaction																R01593	"(5Z,8Z,11Z,14Z)-Icosatetraenoic acid+Oxygen=15(S)-HPETE"	no	endoplasmic reticulum|cytosol|extracellular|nucleus|mitochondria	Arachidonic acid metabolism	R01593	FALSE	R01593	Reaction
R01595	Reaction																R01595	"(5Z,8Z,11Z,14Z)-Icosatetraenoic acid+Oxygen=5(S)-HPETE"	no	cytosol|nucleus	Leukotriene metabolism	R01595	FALSE	R01595	Reaction
R01596	Reaction																R01596	"(5Z,8Z,11Z,14Z)-Icosatetraenoic acid+Oxygen=12(S)-HPETE"	no	cytosol|extracellular|nucleus|mitochondria	Arachidonic acid metabolism	R01596	FALSE	R01596	Reaction
R04837	Reaction																R04837	"Tetrahydrocorticosterone+NAD+ <=>11beta,21-Dihydroxy-5beta-pregnane-3,20-dione+NADH+H+"	yes	cytosol	C21-steroid hormone biosynthesis and metabolism	R04837	TRUE	R04837	Reaction
R04838	Reaction																R04838	"Tetrahydrocorticosterone+NADP+ <=>11beta,21-Dihydroxy-5beta-pregnane-3,20-dione+NADPH+H+"	yes	cytosol	C21-steroid hormone biosynthesis and metabolism	R04838	TRUE	R04838	Reaction
R04839	Reaction																R04839	"Tetrahydrocorticosterone+NAD+ <=>3alpha,21-Dihydroxy-5beta-pregnane-11,20-dione+NADH+H+"	yes	endoplasmic reticulum|cytosol	C21-steroid hormone biosynthesis and metabolism	R04839	TRUE	R04839	Reaction
R04840	Reaction																R04840	"Tetrahydrocorticosterone+NADP+ <=>3alpha,21-Dihydroxy-5beta-pregnane-11,20-dione+NADPH+H+"	yes	endoplasmic reticulum|cytosol	C21-steroid hormone biosynthesis and metabolism	R04840	TRUE	R04840	Reaction
R07041	Reaction																R07041	"(5Z,8Z,11Z,14Z)-Icosatetraenoic acid+Oxygen+NADPH+H+ <=>20-HETE+NADP++H2O"	no	endoplasmic reticulum|cytosol	Arachidonic acid metabolism	R07041	FALSE	R07041	Reaction
R07046	Reaction																R07046	"(5Z,8Z,11Z,14Z)-Icosatetraenoic acid+Oxygen+NADPH+H+ <=>19(S)-HETE+NADP++H2O"	no	endoplasmic reticulum|cytosol	Arachidonic acid metabolism	R07046	FALSE	R07046	Reaction
R07048	Reaction																R07048	"(5Z,8Z,11Z,14Z)-Icosatetraenoic acid+Oxygen+NADPH+H+ <=>14,15-EET+NADP++H2O"	no	endoplasmic reticulum|cytosol	Arachidonic acid metabolism	R07048	FALSE	R07048	Reaction
R07050	Reaction																R07050	"(5Z,8Z,11Z,14Z)-Icosatetraenoic acid+Oxygen+NADPH+H+ <=>11,12-EET+NADP++H2O"	no	endoplasmic reticulum|cytosol	Arachidonic acid metabolism	R07050	FALSE	R07050	Reaction
R07051	Reaction																R07051	"(5Z,8Z,11Z,14Z)-Icosatetraenoic acid+Oxygen+NADPH+H+ <=>8,9-EET+NADP++H2O"	no	endoplasmic reticulum|cytosol	Arachidonic acid metabolism	R07051	FALSE	R07051	Reaction
R07052	Reaction																R07052	"(5Z,8Z,11Z,14Z)-Icosatetraenoic acid+Oxygen+NADPH+H+ <=>5,6-EET+NADP++H2O"	no	endoplasmic reticulum|cytosol	Arachidonic acid metabolism	R07052	FALSE	R07052	Reaction
R07054	Reaction																R07054	"(5Z,8Z,11Z,14Z)-Icosatetraenoic acid+Oxygen+NADPH+H+ <=>16(R)-HETE+NADP++H2O"	no	endoplasmic reticulum|cytosol	Arachidonic acid metabolism	R07054	FALSE	R07054	Reaction
RE0324	Reaction																RE0324	"arachidonate+ATP+CoA = AMP+arachidonoyl-CoA+PP(,i)"	yes	endoplasmic reticulum|cytosol	Omega-6 fatty acid metabolism	RE0324	FALSE	RE0324	Reaction
RE1978	Reaction																RE1978	"H(,2)O+anandamide = arachidonate+ethanolamine"	yes	cytosol	Prostaglandin formation from arachidonate	RE1978	FALSE	RE1978	Reaction
RE3042	Reaction																RE3042	"arachidonate+O(,2)+reduced acceptor = acceptor+H(,2)O+15(`R`)-Hydroxy-(5`Z`,8`Z`,11`Z`,13`E`)-eicosatetraenoate"	no	endoplasmic reticulum|cytosol|nucleus	Arachidonic acid metabolism	RE3042	FALSE	RE3042	Reaction
RE3286	Reaction																RE3286	"arachidonate+FADH(,2)+O(,2) = FAD+H(,2)O+5,6-epoxy-(8Z,11Z,14Z)-eicosatrienoic acid"	no	endoplasmic reticulum|cytosol	Arachidonic acid metabolism	RE3286	FALSE	RE3286	Reaction
RE3287	Reaction																RE3287	"arachidonate+FADH(,2)+O(,2) = FAD+H(,2)O+11,12-epoxy-(5`Z`,8`Z`,14`Z`)-eicosatrienoate"	no	endoplasmic reticulum|cytosol	Arachidonic acid metabolism	RE3287	FALSE	RE3287	Reaction
RE3288	Reaction																RE3288	"arachidonate+FADH(,2)+O(,2) = FAD+H(,2)O+8,9-epoxy-(5Z,11Z,14Z)-eicosatrienoic acid"	no	endoplasmic reticulum|cytosol	Arachidonic acid metabolism	RE3288	FALSE	RE3288	Reaction
RE3289	Reaction																RE3289	"arachidonate+FADH(,2)+O(,2) = FAD+H(,2)O+14,15-epoxy-(5`Z`,8`Z`,11`Z`)-eicosatrienoate"	no	endoplasmic reticulum|cytosol	Arachidonic acid metabolism	RE3289	FALSE	RE3289	Reaction
RE3646	Reaction																RE3646	"arachidonate+NADPH+O(,2)+H('+) = H(,2)O+NADP('+)+8-hydroxyeicosatetraenoate"	no	endoplasmic reticulum|cytosol	Arachidonic acid metabolism	RE3646	FALSE	RE3646	Reaction
RE3647	Reaction																RE3647	"arachidonate+NADPH+O(,2)+H('+) = H(,2)O+NADP('+)+11-hydroxyeicosatetraenoate"	no	endoplasmic reticulum|cytosol	Arachidonic acid metabolism	RE3647	FALSE	RE3647	Reaction
RE3648	Reaction																RE3648	"arachidonate+NADPH+O(,2)+H('+) = H(,2)O+NADP('+)+9-HETE"	no	endoplasmic reticulum|cytosol	Arachidonic acid metabolism	RE3648	FALSE	RE3648	Reaction
RE3649	Reaction																RE3649	"arachidonate+NADPH+O(,2)+H('+) = H(,2)O+NADP('+)+13-HETE"	no	endoplasmic reticulum|cytosol	Arachidonic acid metabolism	RE3649	FALSE	RE3649	Reaction
RE3650	Reaction																RE3650	"arachidonate+NADPH+O(,2)+H('+) = H(,2)O+NADP('+)+7-HETE"	no	endoplasmic reticulum|cytosol	Arachidonic acid metabolism	RE3650	FALSE	RE3650	Reaction
RE3651	Reaction																RE3651	"arachidonate+NADPH+O(,2)+H('+) = H(,2)O+NADP('+)+10-HETE"	no	endoplasmic reticulum|cytosol	Arachidonic acid metabolism	RE3651	FALSE	RE3651	Reaction
RE3653	Reaction																RE3653	"arachidonate+NADPH+O(,2)+H('+) = H(,2)O+NADP('+)+18-HETE"	no	endoplasmic reticulum|cytosol	Arachidonic acid metabolism	RE3653	FALSE	RE3653	Reaction
RE3654	Reaction																RE3654	"arachidonate+NADPH+O(,2)+H('+) = H(,2)O+NADP('+)+17-HETE"	no	endoplasmic reticulum|cytosol	Arachidonic acid metabolism	RE3654	FALSE	RE3654	Reaction

## Sheet: Reaction
canonicalName	Category	name	Reaction.equation	Reaction.locations	Reaction.pathway	Reaction.rid	selected	shared name	Type
11-beta-hydroxysteroid dehydrogenase	Enzyme	1.1.1.146					TRUE	1.1.1.146	Enzyme
3-alpha-hydroxysteroid dehydrogenase (B-specific)	Enzyme	1.1.1.50					TRUE	1.1.1.50	Enzyme
Arachidonate 12-lipoxygenase	Enzyme	1.13.11.31					FALSE	1.13.11.31	Enzyme
Arachidonate 15-lipoxygenase	Enzyme	1.13.11.33					FALSE	1.13.11.33	Enzyme
Arachidonate 5-lipoxygenase	Enzyme	1.13.11.34					FALSE	1.13.11.34	Enzyme
Unspecific monooxygenase	Enzyme	1.14.14.1					FALSE	1.14.14.1	Enzyme
Alkane 1-monooxygenase	Enzyme	1.14.15.3					FALSE	1.14.15.3	Enzyme
Prostaglandin-endoperoxide synthase	Enzyme	1.14.99.1					FALSE	1.14.99.1	Enzyme
SLC27A2	Gene	11001					FALSE	11001	Gene
AKR1C4	Gene	1109					TRUE	1109	Gene
CYP4F8	Gene	11283					FALSE	11283	Gene
PLA2G4E	Gene	123745					FALSE	123745	Gene
CYP1A1	Gene	1543					FALSE	1543	Gene
CYP1A2	Gene	1544					FALSE	1544	Gene
CYP1B1	Gene	1545					FALSE	1545	Gene
CYP2A6	Gene	1548					FALSE	1548	Gene
CYP2A7	Gene	1549					FALSE	1549	Gene
CYP3A7	Gene	1551					FALSE	1551	Gene
CYP2A13	Gene	1553					FALSE	1553	Gene
CYP2B6	Gene	1555					FALSE	1555	Gene
CYP2C8	Gene	1558					FALSE	1558	Gene
CYP2C9	Gene	1559					FALSE	1559	Gene
CYP2C18	Gene	1562					FALSE	1562	Gene
CYP2D6	Gene	1565					FALSE	1565	Gene
CYP2E1	Gene	1571					FALSE	1571	Gene
CYP2F1	Gene	1572					FALSE	1572	Gene
CYP2J2	Gene	1573					FALSE	1573	Gene
CYP3A4	Gene	1576					FALSE	1576	Gene
CYP3A5	Gene	1577					FALSE	1577	Gene
CYP4A11	Gene	1579					FALSE	1579	Gene
CYP4B1	Gene	1580					FALSE	1580	Gene
CYP19A1	Gene	1588					FALSE	1588	Gene
CYP4Z1	Gene	199974					FALSE	199974	Gene
ACSL1	Gene	2180					FALSE	2180	Gene
ACSL3	Gene	2181					FALSE	2181	Gene
ACSL4	Gene	2182					FALSE	2182	Gene
ACSL6	Gene	23305					FALSE	23305	Gene
ALOX12	Gene	239					FALSE	239	Gene
ALOX5	Gene	240					FALSE	240	Gene
ALOX15	Gene	246					FALSE	246	Gene
ALOX15B	Gene	247					FALSE	247	Gene
PLA2G4F	Gene	255189					FALSE	255189	Gene
CYP4X1	Gene	260293					FALSE	260293	Gene
PLA2G2D	Gene	26279					FALSE	26279	Gene
PLA2G4D	Gene	283748					FALSE	283748	Gene
CYP4A22	Gene	284541					FALSE	284541	Gene
CYP2S1	Gene	29785					FALSE	29785	Gene
Acting on ester bonds	Enzyme	3.1.-.-					FALSE	3.1.-.-	Enzyme
Phospholipase A(2)	Enzyme	3.1.1.4					FALSE	3.1.1.4	Enzyme
PLA2G2E	Gene	30814					FALSE	30814	Gene
HSD11B1	Gene	3290					TRUE	3290	Gene
HSD11B2	Gene	3291					TRUE	3291	Gene
PLA2G3	Gene	50487					FALSE	50487	Gene
ACSL5	Gene	51703					FALSE	51703	Gene
PFKFB1	Gene	5207					FALSE	5207	Gene
PFKFB2	Gene	5208					FALSE	5208	Gene
PLA2G1B	Gene	5319					FALSE	5319	Gene
PLA2G2A	Gene	5320					FALSE	5320	Gene
PLA2G4A	Gene	5321					FALSE	5321	Gene
PLA2G5	Gene	5322					FALSE	5322	Gene
PTGS1	Gene	5742					FALSE	5742	Gene
PTGS2	Gene	5743					FALSE	5743	Gene
CYP4F11	Gene	57834					FALSE	57834	Gene
Long-chain-fatty-acid--CoA ligase	Enzyme	6.2.1.3					FALSE	6.2.1.3	Enzyme
PLA2G2F	Gene	64600					FALSE	64600	Gene
CYP3A43	Gene	64816					FALSE	64816	Gene
CYP4F12	Gene	66002					FALSE	66002	Gene
PLA2G12A	Gene	81579					FALSE	81579	Gene
PLA2G6	Gene	8398					FALSE	8398	Gene
PLA2G10	Gene	8399					FALSE	8399	Gene
PLA2G12B	Gene	84647					FALSE	84647	Gene
PLA2G4C	Gene	8605					FALSE	8605	Gene
LOC100137047-PLA2G4B	Gene	8681					FALSE	8681	Gene
Phosphatidylcholine	Compound	C00157					FALSE	C00157	Compound
Ethanolamine	Compound	C00189					FALSE	C00189	Compound
Arachidonate	Input Compound	C00219					FALSE	C00219	Compound
Arachidonyl-CoA	Compound	C02249					FALSE	C02249	Compound
5(S)-HPETE	Compound	C05356					FALSE	C05356	Compound
"11beta,21-Dihydroxy-5beta-pregnane-3,20-dione"	Compound	C05475					TRUE	C05475	Compound
Tetrahydrocorticosterone	Input Compound	C05476					TRUE	C05476	Compound
"3alpha,21-Dihydroxy-5beta-pregnane-11,20-dione"	Compound	C05478					TRUE	C05478	Compound
Prostaglandin G2	Compound	C05956					FALSE	C05956	Compound
12(S)-HPETE	Compound	C05965					FALSE	C05965	Compound
15(S)-HPETE	Compound	C05966					FALSE	C05966	Compound
Anandamide	Compound	C11695					FALSE	C11695	Compound
20-HETE	Compound	C14748					FALSE	C14748	Compound
19(S)-HETE	Compound	C14749					FALSE	C14749	Compound
"5,6-EET"	Compound	C14768					FALSE	C14768	Compound
"8,9-EET"	Compound	C14769					FALSE	C14769	Compound
"11,12-EET"	Compound	C14770					FALSE	C14770	Compound
"14,15-EET"	Compound	C14771					FALSE	C14771	Compound
16(R)-HETE	Compound	C14778					FALSE	C14778	Compound
9(S)-HETE	Compound	C14779					FALSE	C14779	Compound
11-hydroxyeicosatetraenoate	Compound	CE1450					FALSE	CE1450	Compound
"15(R)-Hydroxy-(5Z,8Z,11Z,13E)-eicosatetraenoate"	Compound	CE2565					FALSE	CE2565	Compound
8-hydroxyeicosatetraenoate	Compound	CE5705					FALSE	CE5705	Compound
13-HETE	Compound	CE7228					FALSE	CE7228	Compound
7-HETE	Compound	CE7231					FALSE	CE7231	Compound
10-HETE	Compound	CE7234					FALSE	CE7234	Compound
18-HETE	Compound	CE7243					FALSE	CE7243	Compound
17-HETE	Compound	CE7244					FALSE	CE7244	Compound
R01317	Reaction	R01317	"Phosphatidylcholine+H2O=Lysophospholipid +(5Z,8Z,11Z,14Z)-Icosatetraenoic acid"	endoplasmic reticulum|cytosol|extracellular|mitochondria	Arachidonic acid metabolism	R01317	FALSE	R01317	Reaction
R01590	Reaction	R01590	"(5Z,8Z,11Z,14Z)-Icosatetraenoic acid+2 Oxygen=Prostaglandin G2"	endoplasmic reticulum|cytosol	Prostaglandin formation from arachidonate	R01590	FALSE	R01590	Reaction
R01593	Reaction	R01593	"(5Z,8Z,11Z,14Z)-Icosatetraenoic acid+Oxygen=15(S)-HPETE"	endoplasmic reticulum|cytosol|extracellular|nucleus|mitochondria	Arachidonic acid metabolism	R01593	FALSE	R01593	Reaction
R01595	Reaction	R01595	"(5Z,8Z,11Z,14Z)-Icosatetraenoic acid+Oxygen=5(S)-HPETE"	cytosol|nucleus	Leukotriene metabolism	R01595	FALSE	R01595	Reaction
R01596	Reaction	R01596	"(5Z,8Z,11Z,14Z)-Icosatetraenoic acid+Oxygen=12(S)-HPETE"	cytosol|extracellular|nucleus|mitochondria	Arachidonic acid metabolism	R01596	FALSE	R01596	Reaction
R04837	Reaction	R04837	"Tetrahydrocorticosterone+NAD+ <=>11beta,21-Dihydroxy-5beta-pregnane-3,20-dione+NADH+H+"	cytosol	C21-steroid hormone biosynthesis and metabolism	R04837	TRUE	R04837	Reaction
R04838	Reaction	R04838	"Tetrahydrocorticosterone+NADP+ <=>11beta,21-Dihydroxy-5beta-pregnane-3,20-dione+NADPH+H+"	cytosol	C21-steroid hormone biosynthesis and metabolism	R04838	TRUE	R04838	Reaction
R04839	Reaction	R04839	"Tetrahydrocorticosterone+NAD+ <=>3alpha,21-Dihydroxy-5beta-pregnane-11,20-dione+NADH+H+"	endoplasmic reticulum|cytosol	C21-steroid hormone biosynthesis and metabolism	R04839	TRUE	R04839	Reaction
R04840	Reaction	R04840	"Tetrahydrocorticosterone+NADP+ <=>3alpha,21-Dihydroxy-5beta-pregnane-11,20-dione+NADPH+H+"	endoplasmic reticulum|cytosol	C21-steroid hormone biosynthesis and metabolism	R04840	TRUE	R04840	Reaction
R07041	Reaction	R07041	"(5Z,8Z,11Z,14Z)-Icosatetraenoic acid+Oxygen+NADPH+H+ <=>20-HETE+NADP++H2O"	endoplasmic reticulum|cytosol	Arachidonic acid metabolism	R07041	FALSE	R07041	Reaction
R07046	Reaction	R07046	"(5Z,8Z,11Z,14Z)-Icosatetraenoic acid+Oxygen+NADPH+H+ <=>19(S)-HETE+NADP++H2O"	endoplasmic reticulum|cytosol	Arachidonic acid metabolism	R07046	FALSE	R07046	Reaction
R07048	Reaction	R07048	"(5Z,8Z,11Z,14Z)-Icosatetraenoic acid+Oxygen+NADPH+H+ <=>14,15-EET+NADP++H2O"	endoplasmic reticulum|cytosol	Arachidonic acid metabolism	R07048	FALSE	R07048	Reaction
R07050	Reaction	R07050	"(5Z,8Z,11Z,14Z)-Icosatetraenoic acid+Oxygen+NADPH+H+ <=>11,12-EET+NADP++H2O"	endoplasmic reticulum|cytosol	Arachidonic acid metabolism	R07050	FALSE	R07050	Reaction
R07051	Reaction	R07051	"(5Z,8Z,11Z,14Z)-Icosatetraenoic acid+Oxygen+NADPH+H+ <=>8,9-EET+NADP++H2O"	endoplasmic reticulum|cytosol	Arachidonic acid metabolism	R07051	FALSE	R07051	Reaction
R07052	Reaction	R07052	"(5Z,8Z,11Z,14Z)-Icosatetraenoic acid+Oxygen+NADPH+H+ <=>5,6-EET+NADP++H2O"	endoplasmic reticulum|cytosol	Arachidonic acid metabolism	R07052	FALSE	R07052	Reaction
R07054	Reaction	R07054	"(5Z,8Z,11Z,14Z)-Icosatetraenoic acid+Oxygen+NADPH+H+ <=>16(R)-HETE+NADP++H2O"	endoplasmic reticulum|cytosol	Arachidonic acid metabolism	R07054	FALSE	R07054	Reaction
RE0324	Reaction	RE0324	"arachidonate+ATP+CoA = AMP+arachidonoyl-CoA+PP(,i)"	endoplasmic reticulum|cytosol	Omega-6 fatty acid metabolism	RE0324	FALSE	RE0324	Reaction
RE1978	Reaction	RE1978	"H(,2)O+anandamide = arachidonate+ethanolamine"	cytosol	Prostaglandin formation from arachidonate	RE1978	FALSE	RE1978	Reaction
RE3042	Reaction	RE3042	"arachidonate+O(,2)+reduced acceptor = acceptor+H(,2)O+15(`R`)-Hydroxy-(5`Z`,8`Z`,11`Z`,13`E`)-eicosatetraenoate"	endoplasmic reticulum|cytosol|nucleus	Arachidonic acid metabolism	RE3042	FALSE	RE3042	Reaction
RE3286	Reaction	RE3286	"arachidonate+FADH(,2)+O(,2) = FAD+H(,2)O+5,6-epoxy-(8Z,11Z,14Z)-eicosatrienoic acid"	endoplasmic reticulum|cytosol	Arachidonic acid metabolism	RE3286	FALSE	RE3286	Reaction
RE3287	Reaction	RE3287	"arachidonate+FADH(,2)+O(,2) = FAD+H(,2)O+11,12-epoxy-(5`Z`,8`Z`,14`Z`)-eicosatrienoate"	endoplasmic reticulum|cytosol	Arachidonic acid metabolism	RE3287	FALSE	RE3287	Reaction
RE3288	Reaction	RE3288	"arachidonate+FADH(,2)+O(,2) = FAD+H(,2)O+8,9-epoxy-(5Z,11Z,14Z)-eicosatrienoic acid"	endoplasmic reticulum|cytosol	Arachidonic acid metabolism	RE3288	FALSE	RE3288	Reaction
RE3289	Reaction	RE3289	"arachidonate+FADH(,2)+O(,2) = FAD+H(,2)O+14,15-epoxy-(5`Z`,8`Z`,11`Z`)-eicosatrienoate"	endoplasmic reticulum|cytosol	Arachidonic acid metabolism	RE3289	FALSE	RE3289	Reaction
RE3646	Reaction	RE3646	"arachidonate+NADPH+O(,2)+H('+) = H(,2)O+NADP('+)+8-hydroxyeicosatetraenoate"	endoplasmic reticulum|cytosol	Arachidonic acid metabolism	RE3646	FALSE	RE3646	Reaction
RE3647	Reaction	RE3647	"arachidonate+NADPH+O(,2)+H('+) = H(,2)O+NADP('+)+11-hydroxyeicosatetraenoate"	endoplasmic reticulum|cytosol	Arachidonic acid metabolism	RE3647	FALSE	RE3647	Reaction
RE3648	Reaction	RE3648	"arachidonate+NADPH+O(,2)+H('+) = H(,2)O+NADP('+)+9-HETE"	endoplasmic reticulum|cytosol	Arachidonic acid metabolism	RE3648	FALSE	RE3648	Reaction
RE3649	Reaction	RE3649	"arachidonate+NADPH+O(,2)+H('+) = H(,2)O+NADP('+)+13-HETE"	endoplasmic reticulum|cytosol	Arachidonic acid metabolism	RE3649	FALSE	RE3649	Reaction
RE3650	Reaction	RE3650	"arachidonate+NADPH+O(,2)+H('+) = H(,2)O+NADP('+)+7-HETE"	endoplasmic reticulum|cytosol	Arachidonic acid metabolism	RE3650	FALSE	RE3650	Reaction
RE3651	Reaction	RE3651	"arachidonate+NADPH+O(,2)+H('+) = H(,2)O+NADP('+)+10-HETE"	endoplasmic reticulum|cytosol	Arachidonic acid metabolism	RE3651	FALSE	RE3651	Reaction
RE3653	Reaction	RE3653	"arachidonate+NADPH+O(,2)+H('+) = H(,2)O+NADP('+)+18-HETE"	endoplasmic reticulum|cytosol	Arachidonic acid metabolism	RE3653	FALSE	RE3653	Reaction
RE3654	Reaction	RE3654	"arachidonate+NADPH+O(,2)+H('+) = H(,2)O+NADP('+)+17-HETE"	endoplasmic reticulum|cytosol	Arachidonic acid metabolism	RE3654	FALSE	RE3654	Reaction

## Sheet: Enzyme
canonicalName	Category	Enzyme.ecnum	Enzyme.name	Gene.description	Gene.human.geneid	Gene.locations	Gene.symbol	name
11-beta-hydroxysteroid dehydrogenase	Enzyme	1.1.1.146	11-beta-hydroxysteroid dehydrogenase					1.1.1.146
3-alpha-hydroxysteroid dehydrogenase (B-specific)	Enzyme	1.1.1.50	3-alpha-hydroxysteroid dehydrogenase (B-specific)					1.1.1.50
Arachidonate 12-lipoxygenase	Enzyme	1.13.11.31	Arachidonate 12-lipoxygenase					1.13.11.31
Arachidonate 15-lipoxygenase	Enzyme	1.13.11.33	Arachidonate 15-lipoxygenase					1.13.11.33
Arachidonate 5-lipoxygenase	Enzyme	1.13.11.34	Arachidonate 5-lipoxygenase					1.13.11.34
Unspecific monooxygenase	Enzyme	1.14.14.1	Unspecific monooxygenase					1.14.14.1
Alkane 1-monooxygenase	Enzyme	1.14.15.3	Alkane 1-monooxygenase					1.14.15.3
Prostaglandin-endoperoxide synthase	Enzyme	1.14.99.1	Prostaglandin-endoperoxide synthase					1.14.99.1
SLC27A2	Gene			"solute carrier family 27 (fatty acid transporter), member 2"	11001	mitochondrion|peroxisome|peroxisomal membrane|peroxisomal matrix|endoplasmic reticulum|membrane|integral to membrane	SLC27A2	11001
AKR1C4	Gene			"aldo-keto reductase family 1, member C4 (chlordecone reductase; 3-alpha hydroxysteroid dehydrogenase, type I; dihydrodiol dehydrogenase 4)"	1109	cytoplasm|cytosol	AKR1C4	1109
CYP4F8	Gene			"cytochrome P450, family 4, subfamily F, polypeptide 8"	11283	endoplasmic reticulum|microsome|membrane|integral to membrane	CYP4F8	11283
PLA2G4E	Gene			"phospholipase A2, group IVE"	123745	cytoplasm|lysosome|cytosol|membrane	PLA2G4E	123745
CYP1A1	Gene			"cytochrome P450, family 1, subfamily A, polypeptide 1"	1543	cytoplasm|mitochondrion|endoplasmic reticulum|microsome|membrane|extrinsic to membrane	CYP1A1	1543
CYP1A2	Gene			"cytochrome P450, family 1, subfamily A, polypeptide 2"	1544	endoplasmic reticulum|endoplasmic reticulum membrane|microsome|membrane|extrinsic to membrane	CYP1A2	1544
CYP1B1	Gene			"cytochrome P450, family 1, subfamily B, polypeptide 1"	1545	endoplasmic reticulum|endoplasmic reticulum membrane|microsome|membrane|extrinsic to membrane	CYP1B1	1545
CYP2A6	Gene			"cytochrome P450, family 2, subfamily A, polypeptide 6"	1548	endoplasmic reticulum|endoplasmic reticulum membrane|microsome|membrane|extrinsic to membrane	CYP2A6	1548
CYP2A7	Gene			"cytochrome P450, family 2, subfamily A, polypeptide 7"	1549	endoplasmic reticulum|microsome|membrane|extrinsic to membrane	CYP2A7	1549
CYP3A7	Gene			"cytochrome P450, family 3, subfamily A, polypeptide 7"	1551	endoplasmic reticulum|endoplasmic reticulum membrane|microsome|membrane|extrinsic to membrane	CYP3A7	1551
CYP2A13	Gene			"cytochrome P450, family 2, subfamily A, polypeptide 13"	1553	endoplasmic reticulum|endoplasmic reticulum membrane|microsome|membrane|extrinsic to membrane	CYP2A13	1553
CYP2B6	Gene			"cytochrome P450, family 2, subfamily B, polypeptide 6"	1555	endoplasmic reticulum|endoplasmic reticulum membrane|microsome|microsome|membrane|extrinsic to membrane	CYP2B6	1555
CYP2C8	Gene			"cytochrome P450, family 2, subfamily C, polypeptide 8"	1558	endoplasmic reticulum|endoplasmic reticulum membrane|microsome|membrane|extrinsic to membrane	CYP2C8	1558
CYP2C9	Gene			"cytochrome P450, family 2, subfamily C, polypeptide 9"	1559	endoplasmic reticulum|endoplasmic reticulum membrane|microsome|microsome|membrane|extrinsic to membrane	CYP2C9	1559
CYP2C18	Gene			"cytochrome P450, family 2, subfamily C, polypeptide 18"	1562	endoplasmic reticulum|endoplasmic reticulum membrane|microsome|membrane|extrinsic to membrane	CYP2C18	1562
CYP2D6	Gene			"cytochrome P450, family 2, subfamily D, polypeptide 6"	1565	endoplasmic reticulum|microsome|membrane|extrinsic to membrane	CYP2D6	1565
CYP2E1	Gene			"cytochrome P450, family 2, subfamily E, polypeptide 1"	1571	Golgi membrane|mitochondrion|endoplasmic reticulum|microsome|membrane|extrinsic to membrane|intrinsic to endoplasmic reticulum membrane	CYP2E1	1571
CYP2F1	Gene			"cytochrome P450, family 2, subfamily F, polypeptide 1"	1572	endoplasmic reticulum|endoplasmic reticulum membrane|microsome|membrane|extrinsic to membrane	CYP2F1	1572
CYP2J2	Gene			"cytochrome P450, family 2, subfamily J, polypeptide 2"	1573	endoplasmic reticulum|microsome|membrane|extrinsic to membrane	CYP2J2	1573
CYP3A4	Gene			"cytochrome P450, family 3, subfamily A, polypeptide 4"	1576	cytoplasm|endoplasmic reticulum|endoplasmic reticulum membrane|microsome|cell surface|membrane|integral to membrane	CYP3A4	1576
CYP3A5	Gene			"cytochrome P450, family 3, subfamily A, polypeptide 5"	1577	endoplasmic reticulum|endoplasmic reticulum membrane|microsome|membrane|extrinsic to membrane	CYP3A5	1577
CYP4A11	Gene			"cytochrome P450, family 4, subfamily A, polypeptide 11"	1579	endoplasmic reticulum|endoplasmic reticulum membrane|microsome|membrane|extrinsic to membrane	CYP4A11	1579
CYP4B1	Gene			"cytochrome P450, family 4, subfamily B, polypeptide 1"	1580	endoplasmic reticulum|endoplasmic reticulum membrane|microsome|membrane|extrinsic to membrane	CYP4B1	1580
CYP19A1	Gene			"cytochrome P450, family 19, subfamily A, polypeptide 1"	1588	membrane fraction|endoplasmic reticulum|membrane|extrinsic to membrane	CYP19A1	1588
CYP4Z1	Gene			"cytochrome P450, family 4, subfamily Z, polypeptide 1"	199974	endoplasmic reticulum|microsome|membrane|integral to membrane	CYP4Z1	199974
ACSL1	Gene			acyl-CoA synthetase long-chain family member 1	2180	soluble fraction|mitochondrion|mitochondrial outer membrane|peroxisome|peroxisomal membrane|endoplasmic reticulum|microsome|cytosol|plasma membrane|integral to membrane	ACSL1	2180
ACSL3	Gene			acyl-CoA synthetase long-chain family member 3	2181	mitochondrion|mitochondrial outer membrane|peroxisome|endoplasmic reticulum|microsome|membrane|integral to membrane	ACSL3	2181
ACSL4	Gene			acyl-CoA synthetase long-chain family member 4	2182	mitochondrion|mitochondrial outer membrane|peroxisome|endoplasmic reticulum|microsome|plasma membrane|integral to membrane	ACSL4	2182
ACSL6	Gene			acyl-CoA synthetase long-chain family member 6	23305	mitochondrion|mitochondrial outer membrane|peroxisome|peroxisomal membrane|endoplasmic reticulum|microsome|plasma membrane|integral to membrane	ACSL6	23305
ALOX12	Gene			arachidonate 12-lipoxygenase	239	cytoplasm|cytosol|sarcolemma	ALOX12	239
ALOX5	Gene			arachidonate 5-lipoxygenase	240	soluble fraction|nucleus|nuclear envelope lumen|cytoplasm|cytosol|membrane|nuclear matrix|extrinsic to membrane|dendrite|nuclear membrane|sarcolemma	ALOX5	240
ALOX15	Gene			arachidonate 15-lipoxygenase	246	cytoplasm|cytosol	ALOX15	246
ALOX15B	Gene			"arachidonate 15-lipoxygenase, type B"	247	intracellular|cytoplasm	ALOX15B	247
PLA2G4F	Gene			"phospholipase A2, group IVF"	255189	cytoplasm|lysosome|cytosol|membrane	PLA2G4F	255189
CYP4X1	Gene			"cytochrome P450, family 4, subfamily X, polypeptide 1"	260293	endoplasmic reticulum|microsome|membrane|extrinsic to membrane	CYP4X1	260293
PLA2G2D	Gene			"phospholipase A2, group IID"	26279	extracellular region	PLA2G2D	26279
PLA2G4D	Gene			"phospholipase A2, group IVD (cytosolic)"	283748	cytoplasm|cytosol|membrane|cytoplasmic vesicle	PLA2G4D	283748
CYP4A22	Gene			"cytochrome P450, family 4, subfamily A, polypeptide 22"	284541	endoplasmic reticulum|microsome|membrane|extrinsic to membrane	CYP4A22	284541
CYP2S1	Gene			"cytochrome P450, family 2, subfamily S, polypeptide 1"	29785	endoplasmic reticulum|endoplasmic reticulum membrane|microsome|membrane|extrinsic to membrane	CYP2S1	29785
Acting on ester bonds	Enzyme	3.1.-.-	Acting on ester bonds					3.1.-.-
Phospholipase A(2)	Enzyme	3.1.1.4	Phospholipase A(2)					3.1.1.4
PLA2G2E	Gene			"phospholipase A2, group IIE"	30814	extracellular region	PLA2G2E	30814
HSD11B1	Gene			hydroxysteroid (11-beta) dehydrogenase 1	3290	endoplasmic reticulum|endoplasmic reticulum membrane|membrane|integral to membrane	HSD11B1	3290
HSD11B2	Gene			hydroxysteroid (11-beta) dehydrogenase 2	3291	cytoplasm|endoplasmic reticulum|microsome	HSD11B2	3291
PLA2G3	Gene			"phospholipase A2, group III"	50487	extracellular region|extracellular space|plasma membrane	PLA2G3	50487
ACSL5	Gene			acyl-CoA synthetase long-chain family member 5	51703	mitochondrion|mitochondrial outer membrane|mitochondrial inner membrane|endoplasmic reticulum|membrane|integral to membrane	ACSL5	51703
PFKFB1	Gene			"6-phosphofructo-2-kinase/fructose-2,6-biphosphatase 1"	5207	cytosol|"6-phosphofructo-2-kinase/fructose-2,6-biphosphatase 1 complex"	PFKFB1	5207
PFKFB2	Gene			"6-phosphofructo-2-kinase/fructose-2,6-biphosphatase 2"	5208	cytoplasm|cytosol	PFKFB2	5208
PLA2G1B	Gene			"phospholipase A2, group IB (pancreas)"	5319	extracellular region|extracellular space|secretory granule	PLA2G1B	5319
PLA2G2A	Gene			"phospholipase A2, group IIA (platelets, synovial fluid)"	5320	extracellular region|extracellular space|mitochondrion|endoplasmic reticulum|membrane|extrinsic to membrane|secretory granule	PLA2G2A	5320
PLA2G4A	Gene			"phospholipase A2, group IVA (cytosolic, calcium-dependent)"	5321	membrane fraction|nucleus|cytoplasm|endoplasmic reticulum membrane|cytosol|cytosol|integral to membrane|cytoplasmic membrane-bounded vesicle|zymogen granule|perinuclear region of cytoplasm	PLA2G4A	5321
PLA2G5	Gene			"phospholipase A2, group V"	5322	extracellular region|Golgi apparatus|plasma membrane|cell surface|perinuclear region of cytoplasm	PLA2G5	5322
PTGS1	Gene			prostaglandin-endoperoxide synthase 1 (prostaglandin G/H synthase and cyclooxygenase)	5742	nucleus|nuclear envelope|cytoplasm|cytoplasm|endoplasmic reticulum|microsome|Golgi apparatus|plasma membrane|extrinsic to membrane	PTGS1	5742
PTGS2	Gene			prostaglandin-endoperoxide synthase 2 (prostaglandin G/H synthase and cyclooxygenase)	5743	nucleus|cytoplasm|cytoplasm|endoplasmic reticulum|endoplasmic reticulum lumen|microsome|caveola|membrane|extrinsic to membrane|protein complex	PTGS2	5743
CYP4F11	Gene			"cytochrome P450, family 4, subfamily F, polypeptide 11"	57834	cellular_component|endoplasmic reticulum|endoplasmic reticulum membrane|microsome|membrane|integral to membrane	CYP4F11	57834
Long-chain-fatty-acid--CoA ligase	Enzyme	6.2.1.3	Long-chain-fatty-acid--CoA ligase					6.2.1.3
PLA2G2F	Gene			"phospholipase A2, group IIF"	64600	extracellular region	PLA2G2F	64600
CYP3A43	Gene			"cytochrome P450, family 3, subfamily A, polypeptide 43"	64816	endoplasmic reticulum|microsome|membrane|extrinsic to membrane	CYP3A43	64816
CYP4F12	Gene			"cytochrome P450, family 4, subfamily F, polypeptide 12"	66002	endoplasmic reticulum|endoplasmic reticulum membrane|microsome|membrane|integral to membrane	CYP4F12	66002
PLA2G12A	Gene			"phospholipase A2, group XIIA"	81579	extracellular region|intracellular|cytoplasm|endoplasmic reticulum|Golgi apparatus	PLA2G12A	81579
PLA2G6	Gene			"phospholipase A2, group VI (cytosolic, calcium-independent)"	8398	nucleus|cytoplasm|centrosome|membrane|extrinsic to membrane	PLA2G6	8398
PLA2G10	Gene			"phospholipase A2, group X"	8399	extracellular region	PLA2G10	8399
PLA2G12B	Gene			"phospholipase A2, group XIIB"	84647	extracellular region|endoplasmic reticulum	PLA2G12B	84647
PLA2G4C	Gene			"phospholipase A2, group IVC (cytosolic, calcium-independent)"	8605	cytosol|membrane|anchored to membrane	PLA2G4C	8605
LOC100137047-PLA2G4B	Gene			JMJD7-PLA2G4B readthrough	8681	NONE	LOC100137047-PLA2G4B	8681
Phosphatidylcholine	Compound							C00157
Ethanolamine	Compound							C00189
Arachidonate	Input Compound							C00219
Arachidonyl-CoA	Compound							C02249
5(S)-HPETE	Compound							C05356
"11beta,21-Dihydroxy-5beta-pregnane-3,20-dione"	Compound							C05475
Tetrahydrocorticosterone	Input Compound							C05476
"3alpha,21-Dihydroxy-5beta-pregnane-11,20-dione"	Compound							C05478
Prostaglandin G2	Compound							C05956
12(S)-HPETE	Compound							C05965
15(S)-HPETE	Compound							C05966
Anandamide	Compound							C11695
20-HETE	Compound							C14748
19(S)-HETE	Compound							C14749
"5,6-EET"	Compound							C14768
"8,9-EET"	Compound							C14769
"11,12-EET"	Compound							C14770
"14,15-EET"	Compound							C14771
16(R)-HETE	Compound							C14778
9(S)-HETE	Compound							C14779
11-hydroxyeicosatetraenoate	Compound							CE1450
"15(R)-Hydroxy-(5Z,8Z,11Z,13E)-eicosatetraenoate"	Compound							CE2565
8-hydroxyeicosatetraenoate	Compound							CE5705
13-HETE	Compound							CE7228
7-HETE	Compound							CE7231
10-HETE	Compound							CE7234
18-HETE	Compound							CE7243
17-HETE	Compound							CE7244
R01317	Reaction							R01317
R01590	Reaction							R01590
R01593	Reaction							R01593
R01595	Reaction							R01595
R01596	Reaction							R01596
R04837	Reaction							R04837
R04838	Reaction							R04838
R04839	Reaction							R04839
R04840	Reaction							R04840
R07041	Reaction							R07041
R07046	Reaction							R07046
R07048	Reaction							R07048
R07050	Reaction							R07050
R07051	Reaction							R07051
R07052	Reaction							R07052
R07054	Reaction							R07054
RE0324	Reaction							RE0324
RE1978	Reaction							RE1978
RE3042	Reaction							RE3042
RE3286	Reaction							RE3286
RE3287	Reaction							RE3287
RE3288	Reaction							RE3288
RE3289	Reaction							RE3289
RE3646	Reaction							RE3646
RE3647	Reaction							RE3647
RE3648	Reaction							RE3648
RE3649	Reaction							RE3649
RE3650	Reaction							RE3650
RE3651	Reaction							RE3651
RE3653	Reaction							RE3653
RE3654	Reaction							RE3654

## Sheet: Gene
canonicalName	Category	Gene.description	Gene.human.geneid	Gene.locations	Gene.symbol	name
11-beta-hydroxysteroid dehydrogenase	Enzyme					1.1.1.146
3-alpha-hydroxysteroid dehydrogenase (B-specific)	Enzyme					1.1.1.50
Arachidonate 12-lipoxygenase	Enzyme					1.13.11.31
Arachidonate 15-lipoxygenase	Enzyme					1.13.11.33
Arachidonate 5-lipoxygenase	Enzyme					1.13.11.34
Unspecific monooxygenase	Enzyme					1.14.14.1
Alkane 1-monooxygenase	Enzyme					1.14.15.3
Prostaglandin-endoperoxide synthase	Enzyme					1.14.99.1
SLC27A2	Gene	"solute carrier family 27 (fatty acid transporter), member 2"	11001	mitochondrion|peroxisome|peroxisomal membrane|peroxisomal matrix|endoplasmic reticulum|membrane|integral to membrane	SLC27A2	11001
AKR1C4	Gene	"aldo-keto reductase family 1, member C4 (chlordecone reductase; 3-alpha hydroxysteroid dehydrogenase, type I; dihydrodiol dehydrogenase 4)"	1109	cytoplasm|cytosol	AKR1C4	1109
CYP4F8	Gene	"cytochrome P450, family 4, subfamily F, polypeptide 8"	11283	endoplasmic reticulum|microsome|membrane|integral to membrane	CYP4F8	11283
PLA2G4E	Gene	"phospholipase A2, group IVE"	123745	cytoplasm|lysosome|cytosol|membrane	PLA2G4E	123745
CYP1A1	Gene	"cytochrome P450, family 1, subfamily A, polypeptide 1"	1543	cytoplasm|mitochondrion|endoplasmic reticulum|microsome|membrane|extrinsic to membrane	CYP1A1	1543
CYP1A2	Gene	"cytochrome P450, family 1, subfamily A, polypeptide 2"	1544	endoplasmic reticulum|endoplasmic reticulum membrane|microsome|membrane|extrinsic to membrane	CYP1A2	1544
CYP1B1	Gene	"cytochrome P450, family 1, subfamily B, polypeptide 1"	1545	endoplasmic reticulum|endoplasmic reticulum membrane|microsome|membrane|extrinsic to membrane	CYP1B1	1545
CYP2A6	Gene	"cytochrome P450, family 2, subfamily A, polypeptide 6"	1548	endoplasmic reticulum|endoplasmic reticulum membrane|microsome|membrane|extrinsic to membrane	CYP2A6	1548
CYP2A7	Gene	"cytochrome P450, family 2, subfamily A, polypeptide 7"	1549	endoplasmic reticulum|microsome|membrane|extrinsic to membrane	CYP2A7	1549
CYP3A7	Gene	"cytochrome P450, family 3, subfamily A, polypeptide 7"	1551	endoplasmic reticulum|endoplasmic reticulum membrane|microsome|membrane|extrinsic to membrane	CYP3A7	1551
CYP2A13	Gene	"cytochrome P450, family 2, subfamily A, polypeptide 13"	1553	endoplasmic reticulum|endoplasmic reticulum membrane|microsome|membrane|extrinsic to membrane	CYP2A13	1553
CYP2B6	Gene	"cytochrome P450, family 2, subfamily B, polypeptide 6"	1555	endoplasmic reticulum|endoplasmic reticulum membrane|microsome|microsome|membrane|extrinsic to membrane	CYP2B6	1555
CYP2C8	Gene	"cytochrome P450, family 2, subfamily C, polypeptide 8"	1558	endoplasmic reticulum|endoplasmic reticulum membrane|microsome|membrane|extrinsic to membrane	CYP2C8	1558
CYP2C9	Gene	"cytochrome P450, family 2, subfamily C, polypeptide 9"	1559	endoplasmic reticulum|endoplasmic reticulum membrane|microsome|microsome|membrane|extrinsic to membrane	CYP2C9	1559
CYP2C18	Gene	"cytochrome P450, family 2, subfamily C, polypeptide 18"	1562	endoplasmic reticulum|endoplasmic reticulum membrane|microsome|membrane|extrinsic to membrane	CYP2C18	1562
CYP2D6	Gene	"cytochrome P450, family 2, subfamily D, polypeptide 6"	1565	endoplasmic reticulum|microsome|membrane|extrinsic to membrane	CYP2D6	1565
CYP2E1	Gene	"cytochrome P450, family 2, subfamily E, polypeptide 1"	1571	Golgi membrane|mitochondrion|endoplasmic reticulum|microsome|membrane|extrinsic to membrane|intrinsic to endoplasmic reticulum membrane	CYP2E1	1571
CYP2F1	Gene	"cytochrome P450, family 2, subfamily F, polypeptide 1"	1572	endoplasmic reticulum|endoplasmic reticulum membrane|microsome|membrane|extrinsic to membrane	CYP2F1	1572
CYP2J2	Gene	"cytochrome P450, family 2, subfamily J, polypeptide 2"	1573	endoplasmic reticulum|microsome|membrane|extrinsic to membrane	CYP2J2	1573
CYP3A4	Gene	"cytochrome P450, family 3, subfamily A, polypeptide 4"	1576	cytoplasm|endoplasmic reticulum|endoplasmic reticulum membrane|microsome|cell surface|membrane|integral to membrane	CYP3A4	1576
CYP3A5	Gene	"cytochrome P450, family 3, subfamily A, polypeptide 5"	1577	endoplasmic reticulum|endoplasmic reticulum membrane|microsome|membrane|extrinsic to membrane	CYP3A5	1577
CYP4A11	Gene	"cytochrome P450, family 4, subfamily A, polypeptide 11"	1579	endoplasmic reticulum|endoplasmic reticulum membrane|microsome|membrane|extrinsic to membrane	CYP4A11	1579
CYP4B1	Gene	"cytochrome P450, family 4, subfamily B, polypeptide 1"	1580	endoplasmic reticulum|endoplasmic reticulum membrane|microsome|membrane|extrinsic to membrane	CYP4B1	1580
CYP19A1	Gene	"cytochrome P450, family 19, subfamily A, polypeptide 1"	1588	membrane fraction|endoplasmic reticulum|membrane|extrinsic to membrane	CYP19A1	1588
CYP4Z1	Gene	"cytochrome P450, family 4, subfamily Z, polypeptide 1"	199974	endoplasmic reticulum|microsome|membrane|integral to membrane	CYP4Z1	199974
ACSL1	Gene	acyl-CoA synthetase long-chain family member 1	2180	soluble fraction|mitochondrion|mitochondrial outer membrane|peroxisome|peroxisomal membrane|endoplasmic reticulum|microsome|cytosol|plasma membrane|integral to membrane	ACSL1	2180
ACSL3	Gene	acyl-CoA synthetase long-chain family member 3	2181	mitochondrion|mitochondrial outer membrane|peroxisome|endoplasmic reticulum|microsome|membrane|integral to membrane	ACSL3	2181
ACSL4	Gene	acyl-CoA synthetase long-chain family member 4	2182	mitochondrion|mitochondrial outer membrane|peroxisome|endoplasmic reticulum|microsome|plasma membrane|integral to membrane	ACSL4	2182
ACSL6	Gene	acyl-CoA synthetase long-chain family member 6	23305	mitochondrion|mitochondrial outer membrane|peroxisome|peroxisomal membrane|endoplasmic reticulum|microsome|plasma membrane|integral to membrane	ACSL6	23305
ALOX12	Gene	arachidonate 12-lipoxygenase	239	cytoplasm|cytosol|sarcolemma	ALOX12	239
ALOX5	Gene	arachidonate 5-lipoxygenase	240	soluble fraction|nucleus|nuclear envelope lumen|cytoplasm|cytosol|membrane|nuclear matrix|extrinsic to membrane|dendrite|nuclear membrane|sarcolemma	ALOX5	240
ALOX15	Gene	arachidonate 15-lipoxygenase	246	cytoplasm|cytosol	ALOX15	246
ALOX15B	Gene	"arachidonate 15-lipoxygenase, type B"	247	intracellular|cytoplasm	ALOX15B	247
PLA2G4F	Gene	"phospholipase A2, group IVF"	255189	cytoplasm|lysosome|cytosol|membrane	PLA2G4F	255189
CYP4X1	Gene	"cytochrome P450, family 4, subfamily X, polypeptide 1"	260293	endoplasmic reticulum|microsome|membrane|extrinsic to membrane	CYP4X1	260293
PLA2G2D	Gene	"phospholipase A2, group IID"	26279	extracellular region	PLA2G2D	26279
PLA2G4D	Gene	"phospholipase A2, group IVD (cytosolic)"	283748	cytoplasm|cytosol|membrane|cytoplasmic vesicle	PLA2G4D	283748
CYP4A22	Gene	"cytochrome P450, family 4, subfamily A, polypeptide 22"	284541	endoplasmic reticulum|microsome|membrane|extrinsic to membrane	CYP4A22	284541
CYP2S1	Gene	"cytochrome P450, family 2, subfamily S, polypeptide 1"	29785	endoplasmic reticulum|endoplasmic reticulum membrane|microsome|membrane|extrinsic to membrane	CYP2S1	29785
Acting on ester bonds	Enzyme					3.1.-.-
Phospholipase A(2)	Enzyme					3.1.1.4
PLA2G2E	Gene	"phospholipase A2, group IIE"	30814	extracellular region	PLA2G2E	30814
HSD11B1	Gene	hydroxysteroid (11-beta) dehydrogenase 1	3290	endoplasmic reticulum|endoplasmic reticulum membrane|membrane|integral to membrane	HSD11B1	3290
HSD11B2	Gene	hydroxysteroid (11-beta) dehydrogenase 2	3291	cytoplasm|endoplasmic reticulum|microsome	HSD11B2	3291
PLA2G3	Gene	"phospholipase A2, group III"	50487	extracellular region|extracellular space|plasma membrane	PLA2G3	50487
ACSL5	Gene	acyl-CoA synthetase long-chain family member 5	51703	mitochondrion|mitochondrial outer membrane|mitochondrial inner membrane|endoplasmic reticulum|membrane|integral to membrane	ACSL5	51703
PFKFB1	Gene	"6-phosphofructo-2-kinase/fructose-2,6-biphosphatase 1"	5207	cytosol|"6-phosphofructo-2-kinase/fructose-2,6-biphosphatase 1 complex"	PFKFB1	5207
PFKFB2	Gene	"6-phosphofructo-2-kinase/fructose-2,6-biphosphatase 2"	5208	cytoplasm|cytosol	PFKFB2	5208
PLA2G1B	Gene	"phospholipase A2, group IB (pancreas)"	5319	extracellular region|extracellular space|secretory granule	PLA2G1B	5319
PLA2G2A	Gene	"phospholipase A2, group IIA (platelets, synovial fluid)"	5320	extracellular region|extracellular space|mitochondrion|endoplasmic reticulum|membrane|extrinsic to membrane|secretory granule	PLA2G2A	5320
PLA2G4A	Gene	"phospholipase A2, group IVA (cytosolic, calcium-dependent)"	5321	membrane fraction|nucleus|cytoplasm|endoplasmic reticulum membrane|cytosol|cytosol|integral to membrane|cytoplasmic membrane-bounded vesicle|zymogen granule|perinuclear region of cytoplasm	PLA2G4A	5321
PLA2G5	Gene	"phospholipase A2, group V"	5322	extracellular region|Golgi apparatus|plasma membrane|cell surface|perinuclear region of cytoplasm	PLA2G5	5322
PTGS1	Gene	prostaglandin-endoperoxide synthase 1 (prostaglandin G/H synthase and cyclooxygenase)	5742	nucleus|nuclear envelope|cytoplasm|cytoplasm|endoplasmic reticulum|microsome|Golgi apparatus|plasma membrane|extrinsic to membrane	PTGS1	5742
PTGS2	Gene	prostaglandin-endoperoxide synthase 2 (prostaglandin G/H synthase and cyclooxygenase)	5743	nucleus|cytoplasm|cytoplasm|endoplasmic reticulum|endoplasmic reticulum lumen|microsome|caveola|membrane|extrinsic to membrane|protein complex	PTGS2	5743
CYP4F11	Gene	"cytochrome P450, family 4, subfamily F, polypeptide 11"	57834	cellular_component|endoplasmic reticulum|endoplasmic reticulum membrane|microsome|membrane|integral to membrane	CYP4F11	57834
Long-chain-fatty-acid--CoA ligase	Enzyme					6.2.1.3
PLA2G2F	Gene	"phospholipase A2, group IIF"	64600	extracellular region	PLA2G2F	64600
CYP3A43	Gene	"cytochrome P450, family 3, subfamily A, polypeptide 43"	64816	endoplasmic reticulum|microsome|membrane|extrinsic to membrane	CYP3A43	64816
CYP4F12	Gene	"cytochrome P450, family 4, subfamily F, polypeptide 12"	66002	endoplasmic reticulum|endoplasmic reticulum membrane|microsome|membrane|integral to membrane	CYP4F12	66002
PLA2G12A	Gene	"phospholipase A2, group XIIA"	81579	extracellular region|intracellular|cytoplasm|endoplasmic reticulum|Golgi apparatus	PLA2G12A	81579
PLA2G6	Gene	"phospholipase A2, group VI (cytosolic, calcium-independent)"	8398	nucleus|cytoplasm|centrosome|membrane|extrinsic to membrane	PLA2G6	8398
PLA2G10	Gene	"phospholipase A2, group X"	8399	extracellular region	PLA2G10	8399
PLA2G12B	Gene	"phospholipase A2, group XIIB"	84647	extracellular region|endoplasmic reticulum	PLA2G12B	84647
PLA2G4C	Gene	"phospholipase A2, group IVC (cytosolic, calcium-independent)"	8605	cytosol|membrane|anchored to membrane	PLA2G4C	8605
LOC100137047-PLA2G4B	Gene	JMJD7-PLA2G4B readthrough	8681	NONE	LOC100137047-PLA2G4B	8681
Phosphatidylcholine	Compound					C00157
Ethanolamine	Compound					C00189
Arachidonate	Input Compound					C00219
Arachidonyl-CoA	Compound					C02249
5(S)-HPETE	Compound					C05356
"11beta,21-Dihydroxy-5beta-pregnane-3,20-dione"	Compound					C05475
Tetrahydrocorticosterone	Input Compound					C05476
"3alpha,21-Dihydroxy-5beta-pregnane-11,20-dione"	Compound					C05478
Prostaglandin G2	Compound					C05956
12(S)-HPETE	Compound					C05965
15(S)-HPETE	Compound					C05966
Anandamide	Compound					C11695
20-HETE	Compound					C14748
19(S)-HETE	Compound					C14749
"5,6-EET"	Compound					C14768
"8,9-EET"	Compound					C14769
"11,12-EET"	Compound					C14770
"14,15-EET"	Compound					C14771
16(R)-HETE	Compound					C14778
9(S)-HETE	Compound					C14779
11-hydroxyeicosatetraenoate	Compound					CE1450
"15(R)-Hydroxy-(5Z,8Z,11Z,13E)-eicosatetraenoate"	Compound					CE2565
8-hydroxyeicosatetraenoate	Compound					CE5705
13-HETE	Compound					CE7228
7-HETE	Compound					CE7231
10-HETE	Compound					CE7234
18-HETE	Compound					CE7243
17-HETE	Compound					CE7244
R01317	Reaction					R01317
R01590	Reaction					R01590
R01593	Reaction					R01593
R01595	Reaction					R01595
R01596	Reaction					R01596
R04837	Reaction					R04837
R04838	Reaction					R04838
R04839	Reaction					R04839
R04840	Reaction					R04840
R07041	Reaction					R07041
R07046	Reaction					R07046
R07048	Reaction					R07048
R07050	Reaction					R07050
R07051	Reaction					R07051
R07052	Reaction					R07052
R07054	Reaction					R07054
RE0324	Reaction					RE0324
RE1978	Reaction					RE1978
RE3042	Reaction					RE3042
RE3286	Reaction					RE3286
RE3287	Reaction					RE3287
RE3288	Reaction					RE3288
RE3289	Reaction					RE3289
RE3646	Reaction					RE3646
RE3647	Reaction					RE3647
RE3648	Reaction					RE3648
RE3649	Reaction					RE3649
RE3650	Reaction					RE3650
RE3651	Reaction					RE3651
RE3653	Reaction					RE3653
RE3654	Reaction					RE3654

## Sheet: Compound
canonicalName	Category	Compound.approximateMW	Compound.casnum	Compound.cid	Compound.formula	Compound.mw	Compound.name	Compound.pubchemcid	Compound.smiles	Compound.synonyms	Enzyme.ecnum	Enzyme.name	Gene.description	Gene.human.geneid	Gene.locations	Gene.symbol	name
11-beta-hydroxysteroid dehydrogenase	Enzyme										1.1.1.146	11-beta-hydroxysteroid dehydrogenase					1.1.1.146
3-alpha-hydroxysteroid dehydrogenase (B-specific)	Enzyme										1.1.1.50	3-alpha-hydroxysteroid dehydrogenase (B-specific)					1.1.1.50
Arachidonate 12-lipoxygenase	Enzyme										1.13.11.31	Arachidonate 12-lipoxygenase					1.13.11.31
Arachidonate 15-lipoxygenase	Enzyme										1.13.11.33	Arachidonate 15-lipoxygenase					1.13.11.33
Arachidonate 5-lipoxygenase	Enzyme										1.13.11.34	Arachidonate 5-lipoxygenase					1.13.11.34
Unspecific monooxygenase	Enzyme										1.14.14.1	Unspecific monooxygenase					1.14.14.1
Alkane 1-monooxygenase	Enzyme										1.14.15.3	Alkane 1-monooxygenase					1.14.15.3
Prostaglandin-endoperoxide synthase	Enzyme										1.14.99.1	Prostaglandin-endoperoxide synthase					1.14.99.1
SLC27A2	Gene												"solute carrier family 27 (fatty acid transporter), member 2"	11001	mitochondrion|peroxisome|peroxisomal membrane|peroxisomal matrix|endoplasmic reticulum|membrane|integral to membrane	SLC27A2	11001
AKR1C4	Gene												"aldo-keto reductase family 1, member C4 (chlordecone reductase; 3-alpha hydroxysteroid dehydrogenase, type I; dihydrodiol dehydrogenase 4)"	1109	cytoplasm|cytosol	AKR1C4	1109
CYP4F8	Gene												"cytochrome P450, family 4, subfamily F, polypeptide 8"	11283	endoplasmic reticulum|microsome|membrane|integral to membrane	CYP4F8	11283
PLA2G4E	Gene												"phospholipase A2, group IVE"	123745	cytoplasm|lysosome|cytosol|membrane	PLA2G4E	123745
CYP1A1	Gene												"cytochrome P450, family 1, subfamily A, polypeptide 1"	1543	cytoplasm|mitochondrion|endoplasmic reticulum|microsome|membrane|extrinsic to membrane	CYP1A1	1543
CYP1A2	Gene												"cytochrome P450, family 1, subfamily A, polypeptide 2"	1544	endoplasmic reticulum|endoplasmic reticulum membrane|microsome|membrane|extrinsic to membrane	CYP1A2	1544
CYP1B1	Gene												"cytochrome P450, family 1, subfamily B, polypeptide 1"	1545	endoplasmic reticulum|endoplasmic reticulum membrane|microsome|membrane|extrinsic to membrane	CYP1B1	1545
CYP2A6	Gene												"cytochrome P450, family 2, subfamily A, polypeptide 6"	1548	endoplasmic reticulum|endoplasmic reticulum membrane|microsome|membrane|extrinsic to membrane	CYP2A6	1548
CYP2A7	Gene												"cytochrome P450, family 2, subfamily A, polypeptide 7"	1549	endoplasmic reticulum|microsome|membrane|extrinsic to membrane	CYP2A7	1549
CYP3A7	Gene												"cytochrome P450, family 3, subfamily A, polypeptide 7"	1551	endoplasmic reticulum|endoplasmic reticulum membrane|microsome|membrane|extrinsic to membrane	CYP3A7	1551
CYP2A13	Gene												"cytochrome P450, family 2, subfamily A, polypeptide 13"	1553	endoplasmic reticulum|endoplasmic reticulum membrane|microsome|membrane|extrinsic to membrane	CYP2A13	1553
CYP2B6	Gene												"cytochrome P450, family 2, subfamily B, polypeptide 6"	1555	endoplasmic reticulum|endoplasmic reticulum membrane|microsome|microsome|membrane|extrinsic to membrane	CYP2B6	1555
CYP2C8	Gene												"cytochrome P450, family 2, subfamily C, polypeptide 8"	1558	endoplasmic reticulum|endoplasmic reticulum membrane|microsome|membrane|extrinsic to membrane	CYP2C8	1558
CYP2C9	Gene												"cytochrome P450, family 2, subfamily C, polypeptide 9"	1559	endoplasmic reticulum|endoplasmic reticulum membrane|microsome|microsome|membrane|extrinsic to membrane	CYP2C9	1559
CYP2C18	Gene												"cytochrome P450, family 2, subfamily C, polypeptide 18"	1562	endoplasmic reticulum|endoplasmic reticulum membrane|microsome|membrane|extrinsic to membrane	CYP2C18	1562
CYP2D6	Gene												"cytochrome P450, family 2, subfamily D, polypeptide 6"	1565	endoplasmic reticulum|microsome|membrane|extrinsic to membrane	CYP2D6	1565
CYP2E1	Gene												"cytochrome P450, family 2, subfamily E, polypeptide 1"	1571	Golgi membrane|mitochondrion|endoplasmic reticulum|microsome|membrane|extrinsic to membrane|intrinsic to endoplasmic reticulum membrane	CYP2E1	1571
CYP2F1	Gene												"cytochrome P450, family 2, subfamily F, polypeptide 1"	1572	endoplasmic reticulum|endoplasmic reticulum membrane|microsome|membrane|extrinsic to membrane	CYP2F1	1572
CYP2J2	Gene												"cytochrome P450, family 2, subfamily J, polypeptide 2"	1573	endoplasmic reticulum|microsome|membrane|extrinsic to membrane	CYP2J2	1573
CYP3A4	Gene												"cytochrome P450, family 3, subfamily A, polypeptide 4"	1576	cytoplasm|endoplasmic reticulum|endoplasmic reticulum membrane|microsome|cell surface|membrane|integral to membrane	CYP3A4	1576
CYP3A5	Gene												"cytochrome P450, family 3, subfamily A, polypeptide 5"	1577	endoplasmic reticulum|endoplasmic reticulum membrane|microsome|membrane|extrinsic to membrane	CYP3A5	1577
CYP4A11	Gene												"cytochrome P450, family 4, subfamily A, polypeptide 11"	1579	endoplasmic reticulum|endoplasmic reticulum membrane|microsome|membrane|extrinsic to membrane	CYP4A11	1579
CYP4B1	Gene												"cytochrome P450, family 4, subfamily B, polypeptide 1"	1580	endoplasmic reticulum|endoplasmic reticulum membrane|microsome|membrane|extrinsic to membrane	CYP4B1	1580
CYP19A1	Gene												"cytochrome P450, family 19, subfamily A, polypeptide 1"	1588	membrane fraction|endoplasmic reticulum|membrane|extrinsic to membrane	CYP19A1	1588
CYP4Z1	Gene												"cytochrome P450, family 4, subfamily Z, polypeptide 1"	199974	endoplasmic reticulum|microsome|membrane|integral to membrane	CYP4Z1	199974
ACSL1	Gene												acyl-CoA synthetase long-chain family member 1	2180	soluble fraction|mitochondrion|mitochondrial outer membrane|peroxisome|peroxisomal membrane|endoplasmic reticulum|microsome|cytosol|plasma membrane|integral to membrane	ACSL1	2180
ACSL3	Gene												acyl-CoA synthetase long-chain family member 3	2181	mitochondrion|mitochondrial outer membrane|peroxisome|endoplasmic reticulum|microsome|membrane|integral to membrane	ACSL3	2181
ACSL4	Gene												acyl-CoA synthetase long-chain family member 4	2182	mitochondrion|mitochondrial outer membrane|peroxisome|endoplasmic reticulum|microsome|plasma membrane|integral to membrane	ACSL4	2182
ACSL6	Gene												acyl-CoA synthetase long-chain family member 6	23305	mitochondrion|mitochondrial outer membrane|peroxisome|peroxisomal membrane|endoplasmic reticulum|microsome|plasma membrane|integral to membrane	ACSL6	23305
ALOX12	Gene												arachidonate 12-lipoxygenase	239	cytoplasm|cytosol|sarcolemma	ALOX12	239
ALOX5	Gene												arachidonate 5-lipoxygenase	240	soluble fraction|nucleus|nuclear envelope lumen|cytoplasm|cytosol|membrane|nuclear matrix|extrinsic to membrane|dendrite|nuclear membrane|sarcolemma	ALOX5	240
ALOX15	Gene												arachidonate 15-lipoxygenase	246	cytoplasm|cytosol	ALOX15	246
ALOX15B	Gene												"arachidonate 15-lipoxygenase, type B"	247	intracellular|cytoplasm	ALOX15B	247
PLA2G4F	Gene												"phospholipase A2, group IVF"	255189	cytoplasm|lysosome|cytosol|membrane	PLA2G4F	255189
CYP4X1	Gene												"cytochrome P450, family 4, subfamily X, polypeptide 1"	260293	endoplasmic reticulum|microsome|membrane|extrinsic to membrane	CYP4X1	260293
PLA2G2D	Gene												"phospholipase A2, group IID"	26279	extracellular region	PLA2G2D	26279
PLA2G4D	Gene												"phospholipase A2, group IVD (cytosolic)"	283748	cytoplasm|cytosol|membrane|cytoplasmic vesicle	PLA2G4D	283748
CYP4A22	Gene												"cytochrome P450, family 4, subfamily A, polypeptide 22"	284541	endoplasmic reticulum|microsome|membrane|extrinsic to membrane	CYP4A22	284541
CYP2S1	Gene												"cytochrome P450, family 2, subfamily S, polypeptide 1"	29785	endoplasmic reticulum|endoplasmic reticulum membrane|microsome|membrane|extrinsic to membrane	CYP2S1	29785
Acting on ester bonds	Enzyme										3.1.-.-	Acting on ester bonds					3.1.-.-
Phospholipase A(2)	Enzyme										3.1.1.4	Phospholipase A(2)					3.1.1.4
PLA2G2E	Gene												"phospholipase A2, group IIE"	30814	extracellular region	PLA2G2E	30814
HSD11B1	Gene												hydroxysteroid (11-beta) dehydrogenase 1	3290	endoplasmic reticulum|endoplasmic reticulum membrane|membrane|integral to membrane	HSD11B1	3290
HSD11B2	Gene												hydroxysteroid (11-beta) dehydrogenase 2	3291	cytoplasm|endoplasmic reticulum|microsome	HSD11B2	3291
PLA2G3	Gene												"phospholipase A2, group III"	50487	extracellular region|extracellular space|plasma membrane	PLA2G3	50487
ACSL5	Gene												acyl-CoA synthetase long-chain family member 5	51703	mitochondrion|mitochondrial outer membrane|mitochondrial inner membrane|endoplasmic reticulum|membrane|integral to membrane	ACSL5	51703
PFKFB1	Gene												"6-phosphofructo-2-kinase/fructose-2,6-biphosphatase 1"	5207	cytosol|"6-phosphofructo-2-kinase/fructose-2,6-biphosphatase 1 complex"	PFKFB1	5207
PFKFB2	Gene												"6-phosphofructo-2-kinase/fructose-2,6-biphosphatase 2"	5208	cytoplasm|cytosol	PFKFB2	5208
PLA2G1B	Gene												"phospholipase A2, group IB (pancreas)"	5319	extracellular region|extracellular space|secretory granule	PLA2G1B	5319
PLA2G2A	Gene												"phospholipase A2, group IIA (platelets, synovial fluid)"	5320	extracellular region|extracellular space|mitochondrion|endoplasmic reticulum|membrane|extrinsic to membrane|secretory granule	PLA2G2A	5320
PLA2G4A	Gene												"phospholipase A2, group IVA (cytosolic, calcium-dependent)"	5321	membrane fraction|nucleus|cytoplasm|endoplasmic reticulum membrane|cytosol|cytosol|integral to membrane|cytoplasmic membrane-bounded vesicle|zymogen granule|perinuclear region of cytoplasm	PLA2G4A	5321
PLA2G5	Gene												"phospholipase A2, group V"	5322	extracellular region|Golgi apparatus|plasma membrane|cell surface|perinuclear region of cytoplasm	PLA2G5	5322
PTGS1	Gene												prostaglandin-endoperoxide synthase 1 (prostaglandin G/H synthase and cyclooxygenase)	5742	nucleus|nuclear envelope|cytoplasm|cytoplasm|endoplasmic reticulum|microsome|Golgi apparatus|plasma membrane|extrinsic to membrane	PTGS1	5742
PTGS2	Gene												prostaglandin-endoperoxide synthase 2 (prostaglandin G/H synthase and cyclooxygenase)	5743	nucleus|cytoplasm|cytoplasm|endoplasmic reticulum|endoplasmic reticulum lumen|microsome|caveola|membrane|extrinsic to membrane|protein complex	PTGS2	5743
CYP4F11	Gene												"cytochrome P450, family 4, subfamily F, polypeptide 11"	57834	cellular_component|endoplasmic reticulum|endoplasmic reticulum membrane|microsome|membrane|integral to membrane	CYP4F11	57834
Long-chain-fatty-acid--CoA ligase	Enzyme										6.2.1.3	Long-chain-fatty-acid--CoA ligase					6.2.1.3
PLA2G2F	Gene												"phospholipase A2, group IIF"	64600	extracellular region	PLA2G2F	64600
CYP3A43	Gene												"cytochrome P450, family 3, subfamily A, polypeptide 43"	64816	endoplasmic reticulum|microsome|membrane|extrinsic to membrane	CYP3A43	64816
CYP4F12	Gene												"cytochrome P450, family 4, subfamily F, polypeptide 12"	66002	endoplasmic reticulum|endoplasmic reticulum membrane|microsome|membrane|integral to membrane	CYP4F12	66002
PLA2G12A	Gene												"phospholipase A2, group XIIA"	81579	extracellular region|intracellular|cytoplasm|endoplasmic reticulum|Golgi apparatus	PLA2G12A	81579
PLA2G6	Gene												"phospholipase A2, group VI (cytosolic, calcium-independent)"	8398	nucleus|cytoplasm|centrosome|membrane|extrinsic to membrane	PLA2G6	8398
PLA2G10	Gene												"phospholipase A2, group X"	8399	extracellular region	PLA2G10	8399
PLA2G12B	Gene												"phospholipase A2, group XIIB"	84647	extracellular region|endoplasmic reticulum	PLA2G12B	84647
PLA2G4C	Gene												"phospholipase A2, group IVC (cytosolic, calcium-independent)"	8605	cytosol|membrane|anchored to membrane	PLA2G4C	8605
LOC100137047-PLA2G4B	Gene												JMJD7-PLA2G4B readthrough	8681	NONE	LOC100137047-PLA2G4B	8681
Phosphatidylcholine	Compound	2049	8002-43-5	C00157	C10H18NO8PR2	0	Phosphatidylcholine	452110	CCCCCC(C(CC(C(CCCCCCCC(=O)OCC(COP(=O)([O-])OCC[N+](C)(C)C)OC(=O)CCCCCCCCC(C(CC(C(CC(C(C)I)I)I)I)I)I)I)I)I)I	Phosphatidylcholine|"1,2-Diacyl-sn-glycero-3-phosphocholine"|Lecithin|Choline phosphatide|Phosphatidyl-N-trimethylethanolamine|3-sn-Phosphatidylcholine							C00157
Ethanolamine	Compound	61	141-43-5	C00189	C2H7NO	61.0831	Ethanolamine	700	C(CO)N	Ethanolamine|2-Hydroxyethylamine|Aminoethanol|2-aminoethanol							C00189
Arachidonate	Input Compound	304	506-32-1	C00219	C20H32O2	304.467	Arachidonate	231	CCCCCC=CCC=CCC=CCC=CCCCC(=O)O	Arachidonate|"cis-5,8,11,14-Eicosatetraenoic acid"|"(5Z,8Z,11Z,14Z)-Icosatetraenoic acid"|Arachidonic acid|"(5Z,8Z,11Z,14Z)-icosa-5,8,11,14-tetraenoic acid"							C00219
Arachidonyl-CoA	Compound	1053	17046-56-9	C02249	C41H66N7O17P3S	1053.99	Arachidonyl-CoA	5280503	CCCCC\C=C/C\C=C/C\C=C/C\C=C/CCCC(=O)SCCNC(=O)CCNC(=O)C(O)C(C)(C)COP(O)(=O)OP(O)(=O)OC[C@H]1O[C@H]([C@H](O)[C@@H]1OP(O)(O)=O)n2cnc3c(N)ncnc23	Arachidonyl-CoA|"(5Z,8Z,11Z,14Z)-Icosatetraenoyl-CoA"|Arachidonoyl-CoA|"S-[2-[3-[[4-[[[(2R,3S,4R,5R)-5-(6-aminopurin-9-yl)-4-hydroxy-3-phosphonooxyoxolan-2-yl]methoxy-hydroxyphosphoryl]oxy-hydroxyphosphoryl]oxy-2-hydroxy-3,3-dimethylbutanoyl]amino]propanoylamino]ethyl] (5Z,8Z,11Z,14Z)-icosa-5,8,11,14-tetraenethioate"							C02249
5(S)-HPETE	Compound	336	NULL	C05356	C20H32O4	336.466	5(S)-HPETE	5280778	C(O)(=O)CCCC(OO)C=CC=CCC=CCC=CCCCCC	5(S)-HPETE|"5(S)-Hydroperoxy-6-trans-8,11,14-cis-eicosatetraenoic acid"|"(6E,8Z,11Z,14Z)-(5S)-5-Hydroperoxyeicosa-6,8,11,14-tetraenoic acid"|"(6E,8Z,11Z,14Z)-(5S)-5-Hydroperoxyeicosa-6,8,11,14-tetraenoate"|"(5S,6E,8Z,11Z,14Z)-5-Hydroperoxyicosa-6,8,11,14-tetraenoate"|"(5S,6E,8Z,11Z,14Z)-5-hydroperoxyicosa-6,8,11,14-tetraenoic acid"							C05356
"11beta,21-Dihydroxy-5beta-pregnane-3,20-dione"	Compound	348	566-01-8	C05475	C21H32O4	348.476	"11beta,21-Dihydroxy-5beta-pregnane-3,20-dione"	440696	CC12CCC(=O)CC1CCC3C4CCC(C(=O)CO)C4(C)CC(O)C23	"11beta,21-Dihydroxy-5beta-pregnane-3,20-dione"|"5beta-Pregnane-11beta,21-diol-3,20-dione"|"11-hydroxy-17-(2-hydroxyacetyl)-10,13-dimethyl-1,2,4,5,6,7,8,9,11,12,14,15,16,17-tetradecahydrocyclopenta[a]phenanthren-3-one"							C05475
Tetrahydrocorticosterone	Input Compound	350	68-42-8	C05476	C21H34O4	350.492	Tetrahydrocorticosterone	65553	C[C@]12CC[C@H](C[C@H]1CC[C@@H]3[C@@H]2[C@H](C[C@]4([C@H]3CC[C@@H]4C(=O)CO)C)O)O	Tetrahydrocorticosterone|"1-[(3R,5R,8S,9S,10S,11S,13S,14S,17S)-3,11-dihydroxy-10,13-dimethyl-2,3,4,5,6,7,8,9,11,12,14,15,16,17-tetradecahydro-1H-cyclopenta[a]phenanthren-17-yl]-2-hydroxyethanone"							C05476
"3alpha,21-Dihydroxy-5beta-pregnane-11,20-dione"	Compound	348	566-03-0	C05478	C21H32O4	348.476	"3alpha,21-Dihydroxy-5beta-pregnane-11,20-dione"	440698	CC12CC[C@@H](O)CC1CCC3C4CCC(C(=O)CO)C4(C)CC(=O)C23	"3alpha,21-Dihydroxy-5beta-pregnane-11,20-dione"|"5beta-Pregnane-3alpha,21-diol-11,20-dione"|"(3R)-3-hydroxy-17-(2-hydroxyacetyl)-10,13-dimethyl-1,2,3,4,5,6,7,8,9,12,14,15,16,17-tetradecahydrocyclopenta[a]phenanthren-11-one"							C05478
Prostaglandin G2	Compound	368	NULL	C05956	C20H32O6	368.464	Prostaglandin G2	5280883	CCCCC[C@@H](\C=C\[C@H]1[C@H]2C[C@@H]([C@@H]1C/C=C\CCCC(=O)O)OO2)OO	Prostaglandin G2|PGG2|"(Z)-7-[(1S,4R,5R,6R)-5-[(E,3S)-3-hydroperoxyoct-1-enyl]-2,3-dioxabicyclo[2.2.1]heptan-6-yl]hept-5-enoic acid"							C05956
12(S)-HPETE	Compound	336	NULL	C05965	C20H32O4	336.466	12(S)-HPETE	656507	CCCCCC=CC[C@@H](C=CC=CCC=CCCCC(=O)O)OO	12(S)-HPETE|12-Hydroperoxyicosatetraenoate|"(5Z,8Z,10E,14Z)-(12S)-12-Hydroperoxyicosa-5,8,10,14-tetraenoic acid"|12-Hydroperoxyeicosatetraenoate|12-Hydroperoxyeicosatetraenoic acid|"(5Z,8Z,10E,14Z)-(12S)-12-Hydroperoxyicosa-5,8,10,14-tetraenoate"|12-Hydroperoxyicosatetraenoic acid|"(5Z,8Z,10E,12S,14Z)-12-hydroperoxyicosa-5,8,10,14-tetraenoic acid"							C05965
15(S)-HPETE	Compound	336	NULL	C05966	C20H32O4	336.466	15(S)-HPETE	5280893	CCCCC[C@@H](\C=C\C=C/C\C=C/C\C=C/CCCC(=O)O)OO	15(S)-HPETE|15-Hydroperoxyicosatetraenoate|15-Hydroperoxyeicosatetraenoate|"(5Z,8Z,11Z,13E)-(15S)-15-Hydroperoxyicosa-5,8,11,13-tetraenoic acid"|15-Hydroperoxyeicosatetraenoic acid|15-Hydroperoxyicosatetraenoic acid|"(5Z,8Z,11Z,13E)-(15S)-15-Hydroperoxyicosa-5,8,11,13-tetraenoate"|"(5Z,8Z,11Z,13E,15S)-15-hydroperoxyicosa-5,8,11,13-tetraenoic acid"							C05966
Anandamide	Compound	347	94421-68-8	C11695	C22H37NO2	347.535	Anandamide	5281969	CCCCCC=C/CC=C/CC=C/CC=C/CCCC(=O)NCCO	Anandamide|"N-(5Z,8Z,11Z,14Z-icosatetraenoyl)-ethanolamide"|Arachidonylethanolamide|AEA|"(5Z,8Z,11Z,14Z)-N-(2-hydroxyethyl)icosa-5,8,11,14-tetraenamide"							C11695
20-HETE	Compound	320	79551-86-3	C14748	C20H32O3	320.466	20-HETE	5283157	CCCCC\C=C/C[C@@H](/C=C\C=C/C/C=C/CCCC(=O)O)O	20-HETE|20-Hydroxy arachidonic acid|"(5Z,8Z,11Z,14Z)-20-Hydroxyicosa-5,8,11,14-tetraenoic acid"|20-Hydroxyicosatetraenoic acid|20-Hydroxyeicosatetraenoic acid							C14748
19(S)-HETE	Compound	320	79551-85-2	C14749	C20H32O3	320.466	19(S)-HETE	0	C[C@@H](O)CCC\C=C/C\C=C/C\C=C/C\C=C/CCCC(O)=O	19(S)-HETE|(19S)-Hydroxyeicosatetraenoic acid|(19S)-Hydroxy arachidonic acid|(19S)-Hydroxyicosatetraenoic acid|"(5Z,8Z,11Z,14Z,19R)-19-hydroxyicosa-5,8,11,14-tetraenoic acid"							C14749
"5,6-EET"	Compound	320	NULL	C14768	C20H32O3	320.466	"5,6-EET"	5283202	CCCCC\C=C/C\C=C/C\C=C/CC1OC1CCCC(O)=O	"5,6-EET"|"(8Z,11Z,14Z)-5,6-Epoxyicosa-8,11,14-trienoic acid"|"(8Z,11Z,14Z)-5,6-Epoxyeicosa-8,11,14-trienoic acid"|"4-[3-[(2Z,5Z,8Z)-tetradeca-2,5,8-trienyl]oxiran-2-yl]butanoic acid"							C14768
"8,9-EET"	Compound	320	NULL	C14769	C20H32O3	320.466	"8,9-EET"	5283203	CCCCC\C=C/C\C=C/CC1OC1C\C=C/CCCC(O)=O	"8,9-EET"|"(5Z,11Z,14Z)-8,9-Epoxyeicosa-5,11,14-trienoic acid"|"(5Z,11Z,14Z)-8,9-Epoxyicosa-5,11,14-trienoic acid"|"(Z)-7-[3-[(2Z,5Z)-undeca-2,5-dienyl]oxiran-2-yl]hept-5-enoic acid"							C14769
"11,12-EET"	Compound	320	NULL	C14770	C20H32O3	320.466	"11,12-EET"	5353269	CCCCC\C=C\CC1C(O1)C\C=C\C\C=C\CCCC(=O)O	"11,12-EET"|"(5Z,8Z,14Z)-11,12-Epoxyeicosa-5,8,14-trienoic acid"|"(5Z,8Z,14Z)-11,12-Epoxyicosa-5,8,14-trienoic acid"|"(5Z,8Z)-10-[3-[(Z)-oct-2-enyl]oxiran-2-yl]deca-5,8-dienoic acid"							C14770
"14,15-EET"	Compound	320	NULL	C14771	C20H32O3	320.466	"14,15-EET"	5283205	CCCCCC1OC1C\C=C/C\C=C/C\C=C/CCCC(O)=O	"14,15-EET"|"(5Z,8Z,11Z)-14,15-Epoxyeicosa-5.8.11-trienoic acid"|"(5Z,8Z,11Z)-14,15-Epoxyicosa-5.8.11-trienoic acid"|"(5Z,8Z,11Z)-13-(3-pentyloxiran-2-yl)trideca-5,8,11-trienoic acid"							C14771
16(R)-HETE	Compound	320	NULL	C14778	C20H32O3	320.466	16(R)-HETE	9548884	CCCC[C@@H](O)\C=C/C\C=C/C\C=C/C\C=C/CCCC(O)=O	16(R)-HETE|"(5Z,8Z,11Z,14Z)-(16R)-16-Hydroxyeicosa-5,8,11,14-tetraenoic acid"|"(5Z,8Z,11Z,14Z)-(16R)-16-Hydroxyicosa-5,8,11,14-tetraenoic acid"|"(5Z,8Z,11Z,14Z,16R)-16-hydroxyicosa-5,8,11,14-tetraenoic acid"							C14778
9(S)-HETE	Compound	320	107656-13-3	C14779	C20H32O3	320.466	9(S)-HETE		CCCCC\C=C/C\C=C/C[C@H](O)\C=C\C=C/CCCC(O)=O	9(S)-HETE|"(5Z,7E,11Z,14Z)-(9S)-9-Hydroxyicosa-5,7,11,14-tetraenoic acid"|"(5Z,7E,11Z,14Z)-(9S)-9-Hydroxyeicosa-5,7,11,14-tetraenoic acid"|"(5Z,7E,9S,11Z,14Z)-9-hydroxyicosa-5,7,11,14-tetraenoic acid"							C14779
11-hydroxyeicosatetraenoate	Compound	0	NULL	CE1450	C20H31O3	0	11-hydroxyeicosatetraenoate		CCCCC/C=C\C=C\C(O)C\C=C/C\C=C/CCCC([O-])=O	11-hydroxyeicosatetraenoate|11-HETE|11-hydroxy-arachidonic acid anion|11-hydroxyeicosatetraenoic acid anion							CE1450
"15(R)-Hydroxy-(5Z,8Z,11Z,13E)-eicosatetraenoate"	Compound	0	83603-31-0	CE2565	C20H31O3	0	"15(R)-Hydroxy-(5Z,8Z,11Z,13E)-eicosatetraenoate"		CCCCC[C@@H](O)\C=C\C=C/C\C=C/C\C=C/CCCC([O-])=O	"15(R)-Hydroxy-(5Z,8Z,11Z,13E)-eicosatetraenoate"|15(R)-hydroperoxyeicosatetraenoate|15(R)-HETE|"15(R)-hydroxy-(5Z,8Z,11Z,13E)-eicosatetraenoic acid anion"|"(5Z,8Z,11Z,13E)-(15R)-hydroperoxyeicosa-5,8,11,13-tetraenoic acid anion"							CE2565
8-hydroxyeicosatetraenoate	Compound	0	NULL	CE5705	C20H31O3	0	8-hydroxyeicosatetraenoate		CCCCC\C=C/C/C=C\C=C\C(O)C\C=C/CCCC([O-])=O	8-hydroxyeicosatetraenoate|"8-hydroxy-(5Z,9E,11Z,14Z)-eicosatetraenoic acid"|8-HETE							CE5705
13-HETE	Compound	0	NULL	CE7228	C20H31O3	0	13-HETE		CCCCC\C=C/C(O)\C=C/C\C=C/C\C=C/CCCC([O-])=O	13-HETE|"13-hydroxy-5Z,8Z,11Z,14Z-eicosatetraenoate"							CE7228
7-HETE	Compound	0	NULL	CE7231	C20H31O3	0	7-HETE		"*.[#6]CCCC\C=C/C\C=C/C\C=C/C([#8])\C=C/CCCC([#8-])=O |w:14,13,$ _p;;;;;;;;;;;;;;;;;;;;;;;$|"	7-HETE|"7-hydroxyeicosa-5Z,8Z,11Z,14Z-tetraenoate"							CE7231
10-HETE	Compound	0	NULL	CE7234	C20H31O3	0	10-HETE		CCCCC\C=C/C\C=C/C(O)\C=C/C\C=C/CCCC([O-])=O	10-HETE|"10-hydroxyeicosa-all-cis-5,8,11,14-tetraenoate"							CE7234
18-HETE	Compound	0	NULL	CE7243	C20H31O3	0	18-HETE		CCC(O)CC\C=C/C\C=C/C\C=C/C\C=C/CCCC([O-])=O	18-HETE|"18-hydroxyeicosa -all-cis-5,8,11,14-tetraenoate"|18-hydroxyeicosatetraenate							CE7243
17-HETE	Compound	0	NULL	CE7244	C20H31O3	0	17-HETE		CCCC(O)C\C=C/C\C=C/C\C=C/C\C=C/CCCC([O-])=O	17-HETE|17-hydroxyeicosatetraenate|"17-hydroxyeicosa-all-cis-5,8,11,14-tetraenoate"							CE7244
R01317	Reaction																R01317
R01590	Reaction																R01590
R01593	Reaction																R01593
R01595	Reaction																R01595
R01596	Reaction																R01596
R04837	Reaction																R04837
R04838	Reaction																R04838
R04839	Reaction																R04839
R04840	Reaction																R04840
R07041	Reaction																R07041
R07046	Reaction																R07046
R07048	Reaction																R07048
R07050	Reaction																R07050
R07051	Reaction																R07051
R07052	Reaction																R07052
R07054	Reaction																R07054
RE0324	Reaction																RE0324
RE1978	Reaction																RE1978
RE3042	Reaction																RE3042
RE3286	Reaction																RE3286
RE3287	Reaction																RE3287
RE3288	Reaction																RE3288
RE3289	Reaction																RE3289
RE3646	Reaction																RE3646
RE3647	Reaction																RE3647
RE3648	Reaction																RE3648
RE3649	Reaction																RE3649
RE3650	Reaction																RE3650
RE3651	Reaction																RE3651
RE3653	Reaction																RE3653
RE3654	Reaction																RE3654
